# Supplementary material for: Unexpected insights into antibacterial activity of zinc oxide nanoparticles against methicillin resistantStaphylococcus aureus(MRSA)
Source: Royal Society of Chemistry journal article supplement (doi:10.1039/c7nr08499d), 2018-01-01
Supplement: c7nr08499d1.pdf [file c7nr08499d1.pdf]

1 **Unexpected insights into antibacterial activity of zinc oxide nanoparticles**  
2 **against methicillin resistant**  
3 ***Staphylococcus aureus* (MRSA)**  
4

5 **Supplemental Information**  
6

7 Usha Kadiyala<sup>a, f, g</sup>, Emine Sumeyra Turali Emre<sup>b, c, f</sup>, Joong Hwan Bahng<sup>b, c</sup>,  
8 Nicholas A. Kotov<sup>b, c, d, e, f, g \*</sup>, and J. Scott VanEpps<sup>a, b, f, g \*</sup>  
9

10 Department of Emergency Medicine; University of Michigan; Ann Arbor, USA<sup>a</sup>;  
11 Department of Chemical Engineering; University of Michigan; Ann Arbor, USA<sup>b</sup>;  
12 Department of Biomedical Engineering; University of Michigan; Ann Arbor, USA<sup>c</sup>;  
13 Department of Materials Science and Engineering; University of Michigan; Ann Arbor, USA<sup>d</sup>;  
14 Department of Macromolecular Science and Engineering; University of Michigan; Ann Arbor,  
15 USA<sup>e</sup>; Biointerfaces Institute University of Michigan; University of Michigan; Ann Arbor,  
16 USA<sup>f</sup>; Michigan Center for Integrative Research in Critical Care (MCIRCC); University of  
17 Michigan; Ann Arbor, USA<sup>g</sup>.  
18

19 \*Address correspondence to J. Scott VanEpps, University of Michigan, Department of  
20 Emergency Medicine, NCRC Building 26, Room 327N, 2800 Plymouth Rd, Ann Arbor, MI  
21 48109, phone (734) 763-2702. Email: [jvane@med.umich.edu](mailto:jvane@med.umich.edu), and Nicholas A. Kotov, University  
22 of Michigan, Department of Chemical Engineering, NCRC Building 10, Room A159, 2800  
23 Plymouth Rd, Ann Arbor, MI 48109, phone (734) 763-8768. Email: [kotov@umich.edu](mailto:kotov@umich.edu).  
24

25 The authors have no competing conflicts of interest related to this work.  
26

27 **Figures:**

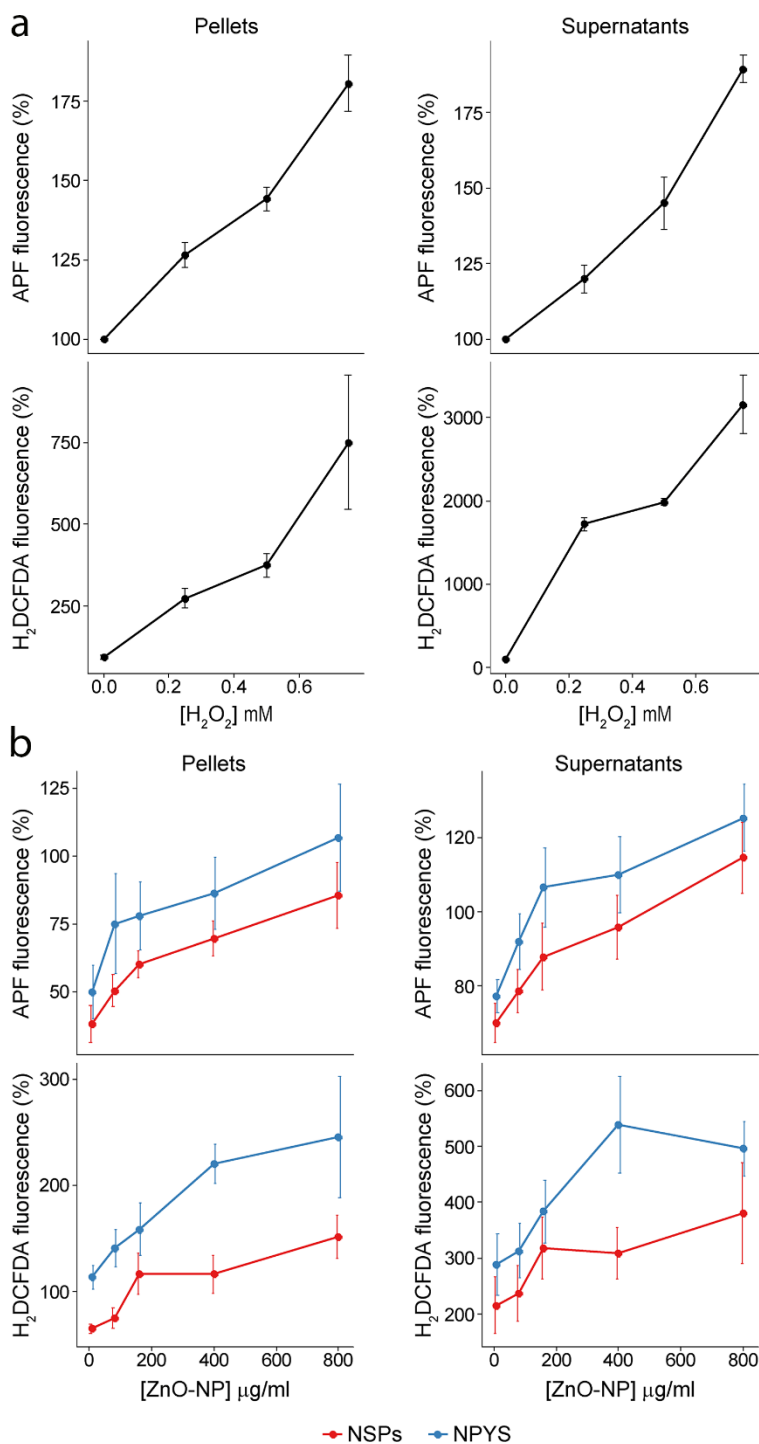

28

29 **Supplemental Figure 1:** ROS detection in bacterial pellets and supernatants by APF and  
 30 H<sub>2</sub>DCFDA fluorescence after 30-minute exposure to increasing concentrations of (a) H<sub>2</sub>O<sub>2</sub> or (b)  
 31 ZnO-NSPs and -NPYS. Error bars represent standard error of five independent experiments run  
 32 on different days. Note that the trends for the supernatants and pellets are identical.

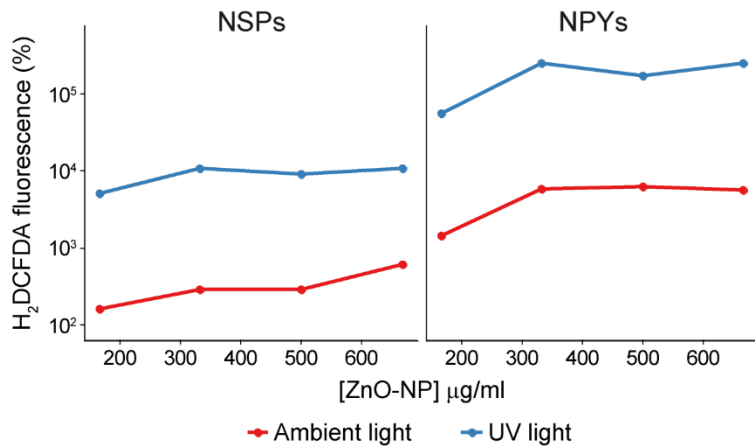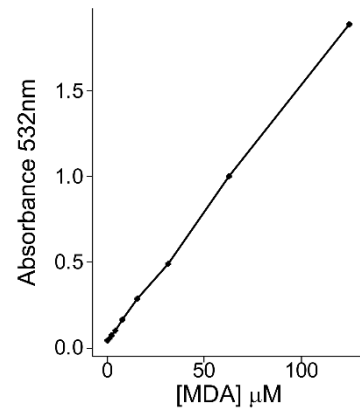

**Supplemental Figure 3:** MDA standard curve for TBARS

**Supplemental Figure 2:** Two minutes of UV light exposure resulted in significant increase in ROS production by ZnO-NPs as measured by H<sub>2</sub>DCFDA fluorescence. However, the general dose dependence trend is unchanged.

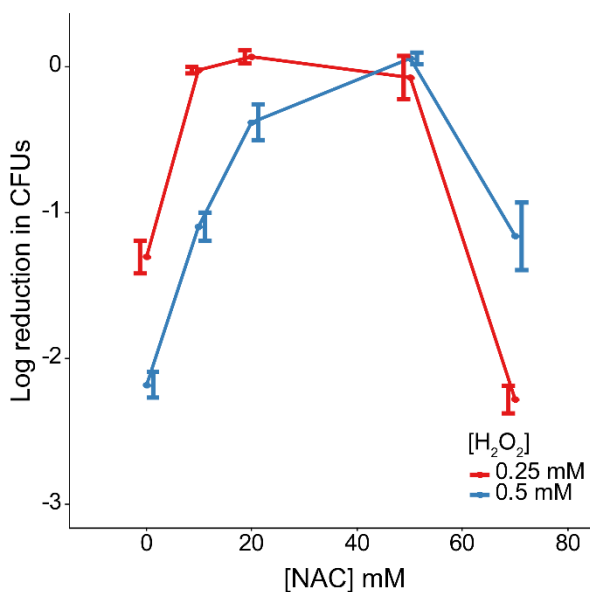

**Supplemental Figure 4:** Dose response of bacterial recovery after exposure to 0.25 and 0.5mM H<sub>2</sub>O<sub>2</sub> in the presence of increasing doses of N-acetylcysteine (NAC). The initial inoculum was 5x10<sup>7</sup> CFU. 50mM NAC leads to complete recovery from a >2 log reduction in colonies caused by 0.5mM H<sub>2</sub>O<sub>2</sub>. Increased doses of NAC beyond 50mM however, lead to toxicity and cell death.

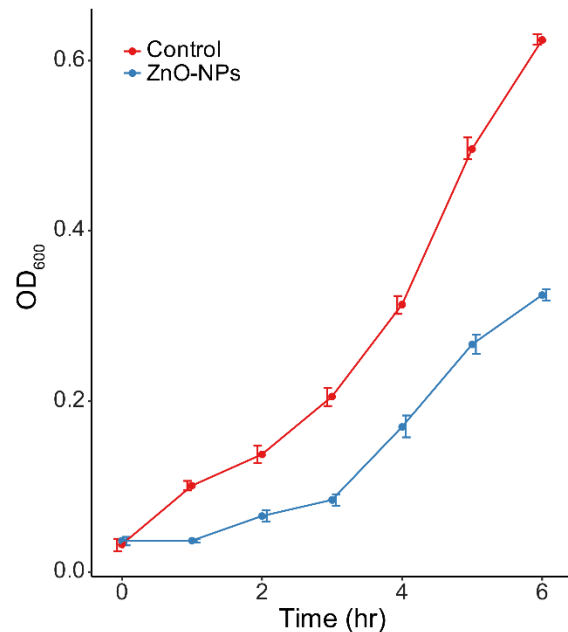

**Supplemental Figure 5:** Growth curves of *S. aureus* with and without 160µg/ml ZnO-NPs used for the gene expression microarray analysis. Each measurement was made in triplicate. Error bars represent standard error.

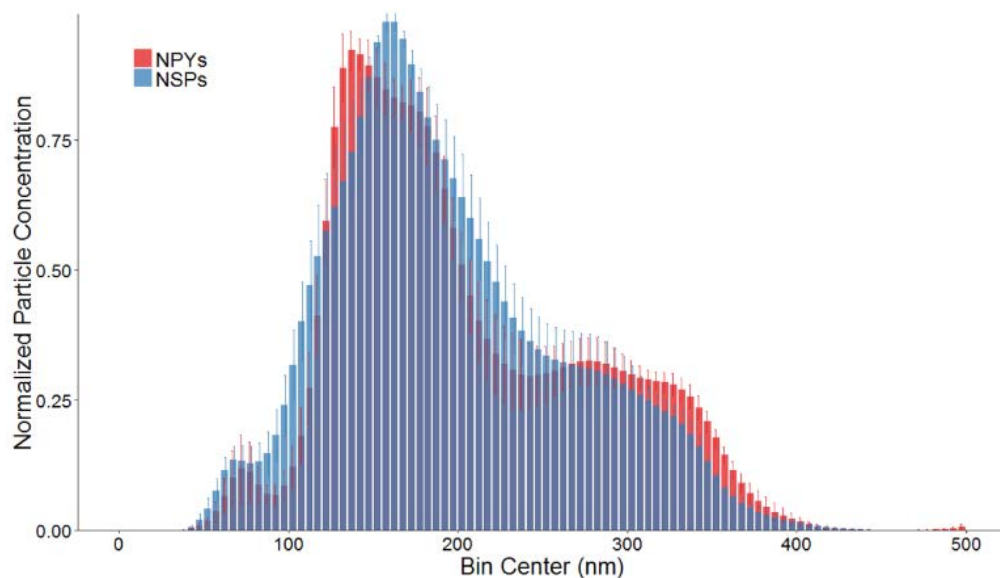

43

44 **Supplemental Figure 6:** Size distribution of nanoparticle aggregates in aqueous dispersion. Error  
 45 bars represent standard deviation from 5 independent samples.

46

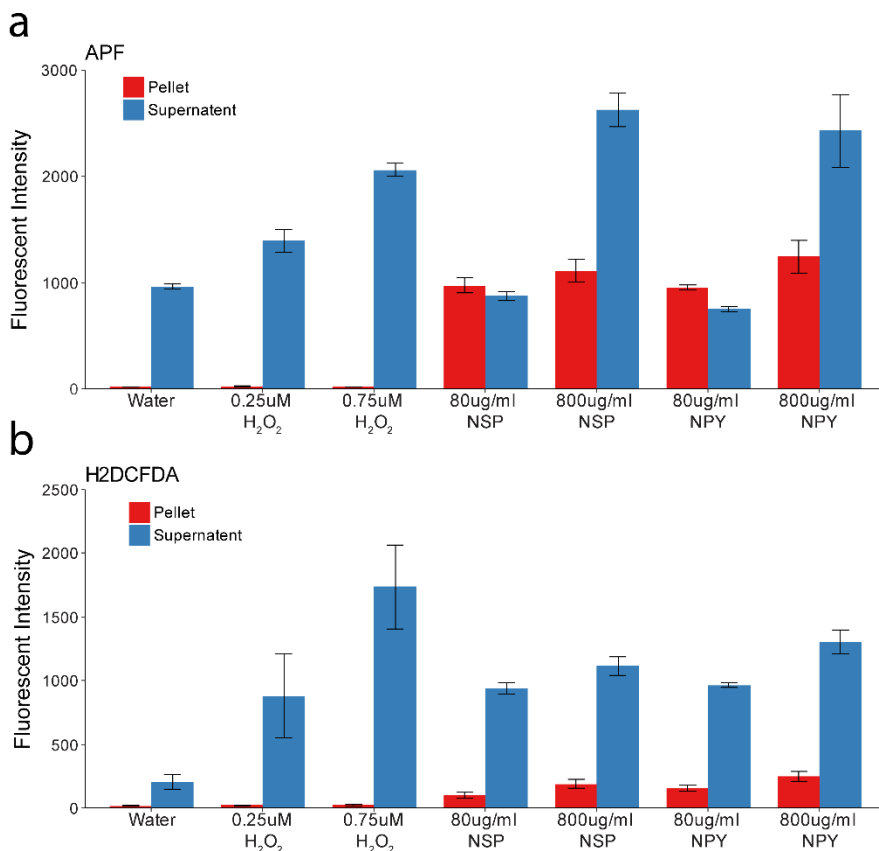

47

48 **Supplemental Figure 7:** Fluorescence of (a) APF and (b) H<sub>2</sub>DCFDA in water, H<sub>2</sub>O<sub>2</sub>, and ZnO-  
 49 NPs. Each measurement was made in triplicate. Error bars represent standard error of three  
 50 independent experiments run on different days.

51

52

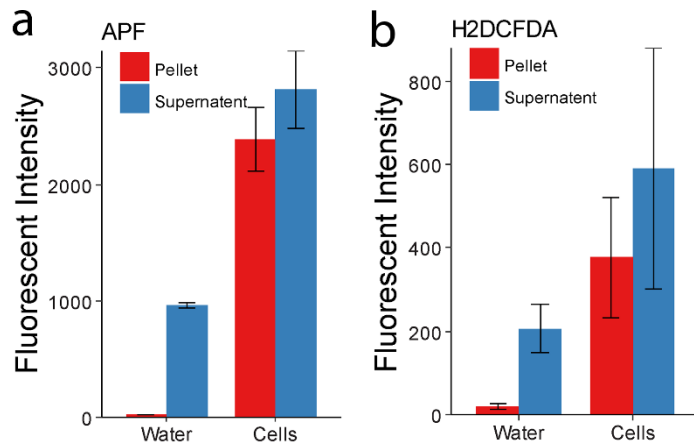

53

54

**Supplemental Figure 8:** Fluorescence of (a) APF and (b) H<sub>2</sub>DCFDA due to baseline cellular respiration. Each measurement was made in triplicate. Error bars represent standard error of three independent experiments run on different days.

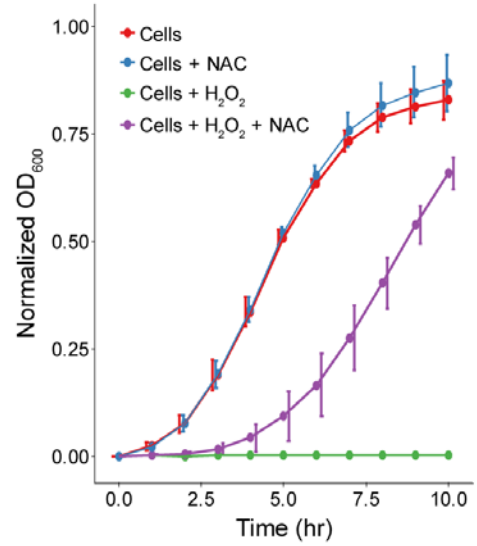

**Supplemental Figure 9:** Growth curves of *S. aureus* with H<sub>2</sub>O<sub>2</sub>, NAC and H<sub>2</sub>O<sub>2</sub> plus NAC. Each measurement was made in triplicate. Error bars represent standard error of five independent experiments run on different days.

**Supplemental Table 1:** Primer pairs for RT-PCR Gene Expression Quantification

| <b>Orientation</b> | <b>Gene</b>     | <b>Primer Sequence (5'--3')</b> |
|--------------------|-----------------|---------------------------------|
| +                  | <i>16s rRNA</i> | TCGTGTCGTGAGATGTTGGG            |
| -                  | <i>16s rRNA</i> | GTTTGTACCCGGCAGTCAAC            |
| +                  | <i>leuD</i>     | GTCGTGAACATGCTGCTTGG            |
| -                  | <i>leuD</i>     | TGGAAACGCTTGTCTGGTGA            |
| +                  | <i>lycC</i>     | ATCCGCCACGTGGAAATGTA            |
| -                  | <i>lycC</i>     | CTGACGTCCCACAAGAAGCA            |
| +                  | <i>katA</i>     | GGAGCGTGACATTCGAGGAT            |
| -                  | <i>katA</i>     | GACCCGTCCAGAAATCCCAG            |
| +                  | <i>pyrE</i>     | GCTGGTATTCCACATGCAGC            |
| -                  | <i>pyrE</i>     | GACTGAAGATCCCCCTGTCTG           |

**Supplemental Table 2: Genes with significantly altered expression in response to ZnO-NPs**

| Accession            | Common Name | Fold Change | Gene products                                                                              | Summary                                                                                                                                                                                                                                                                                                      |
|----------------------|-------------|-------------|--------------------------------------------------------------------------------------------|--------------------------------------------------------------------------------------------------------------------------------------------------------------------------------------------------------------------------------------------------------------------------------------------------------------|
| <i>Downregulated</i> |             |             |                                                                                            |                                                                                                                                                                                                                                                                                                              |
| SACOL0200            | uhpT        | 31.92       | sugar phosphate antiporter                                                                 | cytoplasmic membrane protein that functions as a monomer; catalyzes the active transport of sugar-phosphates such as glucose-6-phosphate with the obligatory exchange of inorganic phosphate or organophosphate                                                                                              |
| SACOL1173            | hiY         | 11.68       | alpha-hemolysin precursor                                                                  | identified by similarity to SP:P09616; match to protein family HMM PF01117; match to protein family HMM TIGR01002                                                                                                                                                                                            |
| SACOL2022            | hld         | 8.13        | delta-hemolysin                                                                            | Lyses erythrocytes and other mammalian cells                                                                                                                                                                                                                                                                 |
| SACOL1083            | purD        | 7.45        | phosphoribosylamine--glycine ligase                                                        | catalyzes the formation of N(1)-(5-phospho-D-ribosyl)glycinamide from 5-phospho-D-ribosylamine and glycine in purine biosynthesis                                                                                                                                                                            |
| SACOL1082            | purH        | 6.30        | bifunctional phosphoribosylaminoimidazole carboxamide formyltransferase/IMP cyclohydrolase | involved in de novo purine biosynthesis                                                                                                                                                                                                                                                                      |
| SACOL2146            |             | 5.48        | PTS system, mannitol-specific IIBC components                                              | identified by match to protein family HMM PF02302; match to protein family HMM PF02378; match to protein family HMM TIGR00851                                                                                                                                                                                |
| SACOL2443            |             | 5.22        | hypothetical protein                                                                       |                                                                                                                                                                                                                                                                                                              |
| SACOL1081            | purN        | 4.98        | phosphoribosylglycinamide formyltransferase                                                | identified by similarity to EGAD:16303; match to protein family HMM PF00551; match to protein family HMM TIGR00639                                                                                                                                                                                           |
| SACOL0095            | spa         | 4.31        | immunoglobulin G binding protein A precursor                                               | identified by similarity to SP:P02976; match to protein family HMM PF00746; match to protein family HMM PF01476; match to protein family HMM PF02216; match to protein family HMM PF03373; match to protein family HMM PF04650; match to protein family HMM TIGR01167; match to protein family HMM TIGR01168 |
| SACOL1080            | purM        | 4.22        | phosphoribosylaminoimidazole synthetase                                                    | catalyzes the formation of 1-(5-phosphoribosyl)-5-aminoimidazole from 2-(formamido)-N1-(5-phosphoribosyl)acetamide and ATP in purine biosynthesis                                                                                                                                                            |
| SACOL0008            | hutH        | 4.11        | histidine ammonia-lyase                                                                    | catalyzes the degradation of histidine to urocanate and ammonia                                                                                                                                                                                                                                              |
| SACOL0882            |             | 4.02        | ABC transporter ATP-binding protein                                                        | identified by match to protein family HMM PF00005                                                                                                                                                                                                                                                            |
| SACOL2422            | hlgB        | 4.01        | gamma hemolysin, component B                                                               | identified by similarity to SP:P31715; match to protein family HMM PF01117; match to protein family HMM TIGR01002                                                                                                                                                                                            |
| SACOL2395            | narG        | 3.97        | respiratory nitrate reductase subunit alpha                                                | identified by similarity to EGAD:30702; match to protein family HMM PF00384; match to protein family HMM PF01568; match to protein family HMM TIGR01580                                                                                                                                                      |
| SACOL2421            | hlgC        | 3.82        | gamma hemolysin, component C                                                               | identified by similarity to SP:P31716; match to protein family HMM PF01117; match to protein family HMM TIGR01002                                                                                                                                                                                            |
| SACOL1477            | ilvA1       | 3.71        | threonine dehydratase                                                                      | catalyzes the formation of 2-oxobutanoate from L-threonine; catabolic                                                                                                                                                                                                                                        |
| SACOL2396            |             | 3.67        | uroporphyrinogen III methylase SirB                                                        | identified by similarity to GP:4433641; match to protein family HMM PF00590; match to protein family HMM TIGR01469                                                                                                                                                                                           |
| SACOL0704            |             | 3.55        | iron compound ABC transporter ATP-binding protein                                          | identified by similarity to EGAD:37683; match to protein family HMM PF00005                                                                                                                                                                                                                                  |
| SACOL0883            |             | 3.55        | ABC transporter permease                                                                   | identified by match to protein family HMM PF00528                                                                                                                                                                                                                                                            |
| SACOL2044            |             | 3.48        | acetolactate synthase 1 regulatory subunit                                                 | with lvi1 catalyzes the formation of 2-acetolactate from pyruvate, this subunit is required for full activity and valine sensitivity; also known as acetolactate synthase small                                                                                                                              |
| SACOL1658            |             | 3.29        | hypothetical protein                                                                       |                                                                                                                                                                                                                                                                                                              |
| SACOL1478            | ald1        | 3.22        | alanine dehydrogenase                                                                      | identified by match to protein family HMM PF01262; match to protein family HMM PF05222; match to protein family HMM TIGR00518                                                                                                                                                                                |
| SACOL0690            |             | 3.13        | ABC transporter ATP-binding protein                                                        | identified by match to protein family HMM PF00005                                                                                                                                                                                                                                                            |
| SACOL0874            |             | 3.13        | nitroreductase                                                                             | identified by match to protein family HMM PF00881                                                                                                                                                                                                                                                            |
| SACOL2554            |             | 3.12        | hypothetical protein                                                                       | identified by match to protein family HMM PF04172                                                                                                                                                                                                                                                            |
| SACOL2024            | agrD        | 3.08        | accessory gene regulator protein D                                                         | identified by similarity to EGAD:18902; match to protein family HMM PF05931                                                                                                                                                                                                                                  |
| SACOL2043            | ilvB        | 3.04        | acetolactate synthase large subunit                                                        | identified by match to protein family HMM PF00205; match to protein family HMM PF02776; match to protein family HMM TIGR00118                                                                                                                                                                                |
| SACOL0768            |             | 3.04        | hypothetical protein                                                                       | identified by similarity to GB:AAO04078.1                                                                                                                                                                                                                                                                    |
| SACOL0413            |             | 3.04        | ribosomal-protein-serine acetyltransferase                                                 | identified by match to protein family HMM PF00583                                                                                                                                                                                                                                                            |
| SACOL1923            |             | 3.03        | hypothetical protein                                                                       | identified by match to protein family HMM PF06081                                                                                                                                                                                                                                                            |
| SACOL0404            |             | 3.02        | MarR family transcriptional regulator                                                      | identified by match to protein family HMM PF01047                                                                                                                                                                                                                                                            |
| SACOL2716            |             | 3.02        | hypothetical protein                                                                       | identified by match to protein family HMM PF03551                                                                                                                                                                                                                                                            |
| SACOL1114            |             | 3.01        | manganese transport protein MntH                                                           | identified by match to protein family HMM PF01566; match to protein family HMM TIGR01197                                                                                                                                                                                                                     |
| SACOL0994            | oppF        | 3.00        | oligopeptide ABC transporter ATP-binding protein                                           | identified by match to protein family HMM PF00005                                                                                                                                                                                                                                                            |
| SACOL2258            | sarV        | 2.95        | hypothetical protein                                                                       | identified by similarity to OMNI:SA2258; match to protein family HMM TIGR01889                                                                                                                                                                                                                               |
| SACOL2394            | narH        | 2.95        | respiratory nitrate reductase subunit beta                                                 | identified by similarity to EGAD:16236; similarity to EGAD:30703; match to protein family HMM TIGR01660                                                                                                                                                                                                      |
| SACOL1428            | lysC        | 2.91        | aspartate kinase                                                                           | catalyzes the formation of 4-phospho-L-aspartate from L-aspartate and ATP, in Bacillus, lysine sensitive; regulated by response to starvation.                                                                                                                                                               |
| SACOL2006            |             | 2.89        | Aerolysin/leukocidin family protein                                                        | identified by match to protein family HMM PF01117                                                                                                                                                                                                                                                            |

**Supplemental Table 2: Genes with significantly altered expression in response to ZnO-NPs**

|           |       |      |                                                           |                                                                                                                                                                                            |
|-----------|-------|------|-----------------------------------------------------------|--------------------------------------------------------------------------------------------------------------------------------------------------------------------------------------------|
| SACOL2734 |       | 2.89 | hypothetical protein                                      | identified by similarity to GB:AAO06055.1                                                                                                                                                  |
| SACOL1476 |       | 2.87 | amino acid permease                                       | identified by match to protein family HMM PF00324                                                                                                                                          |
| SACOL2630 |       | 2.86 | hypothetical protein                                      | identified by similarity to GP:4574119                                                                                                                                                     |
| SACOL1475 |       | 2.86 | drug transporter                                          | identified by match to protein family HMM PF07690                                                                                                                                          |
| SACOL0445 |       | 2.84 | hypothetical protein                                      | identified by similarity to GB:AAO06012.1                                                                                                                                                  |
| SACOL1741 | icd   | 2.84 | isocitrate dehydrogenase                                  | Converts isocitrate to alpha ketoglutarate                                                                                                                                                 |
| SACOL2020 |       | 2.83 | hypothetical protein                                      | identified by match to protein family HMM PF00881                                                                                                                                          |
| SACOL1429 | asd   | 2.83 | aspartate semialdehyde dehydrogenase                      | identified by similarity to EGAD:15165; match to protein family HMM PF01118; match to protein family HMM PF02774; match to protein family HMM TIGR01296                                    |
| SACOL2042 | ilvD  | 2.81 | dihydroxy-acid dehydratase                                | catalyzes the dehydration of 2,3-dihydroxy-3-methylbutanoate to 3-methyl-2-oxobutanoate in valine and isoleucine biosynthesis                                                              |
| SACOL0884 |       | 2.75 | ABC transporter substrate-binding protein                 | identified by match to protein family HMM PF03180                                                                                                                                          |
| SACOL2023 | agrB  | 2.73 | accessory gene regulator protein B                        | identified by match to protein family HMM PF04647                                                                                                                                          |
| SACOL2398 | nirB  | 2.73 | nitrite reductase [NAD(P)H], large subunit                | identified by similarity to EGAD:30822; match to protein family HMM PF00070; match to protein family HMM PF01077; match to protein family HMM PF03460; match to protein family HMM PF04324 |
| SACOL0152 |       | 2.71 | heme-degrading monooxygenase IsdI                         | iron regulated; catalyzes the release of heme from hemoglobin allowing bacterial pathogens to use the host heme as an iron source                                                          |
| SACOL1846 |       | 2.71 | hypothetical protein                                      |                                                                                                                                                                                            |
| SACOL0119 |       | 2.71 | cell wall surface anchor family protein                   | identified by match to protein family HMM PF00746; match to protein family HMM TIGR01167                                                                                                   |
| SACOL1784 | acuA  | 2.70 | acetoin utilization protein AcuA                          | identified by similarity to EGAD:23882                                                                                                                                                     |
| SACOL2025 | argC2 | 2.69 | accessory gene regulator protein C                        | identified by match to protein family HMM PF02518                                                                                                                                          |
| SACOL2393 | narJ  | 2.68 | respiratory nitrate reductase subunit delta               | identified by match to protein family HMM PF02613; match to protein family HMM TIGR00684                                                                                                   |
| SACOL2694 | geh   | 2.66 | lipase                                                    | identified by similarity to SP:Q02510; similarity to EGAD:17843; match to protein family HMM PF04650; match to protein family HMM TIGR01168                                                |
| SACOL0707 |       | 2.63 | dihydroxyacetone kinase subunit DhaK                      | with DhaL and DhaM forms dihydroxyacetone kinase, which is responsible for phosphorylating dihydroxyacetone; DhaK is the dihydroxyacetone binding subunit of the dihydroxyacetone kinase   |
| SACOL1546 | proC  | 2.63 | pyrroline-5-carboxylate reductase                         | identified by similarity to EGAD:45894; match to protein family HMM PF01089; match to protein family HMM TIGR00112                                                                         |
| SACOL0907 | seb   | 2.62 | enterotoxin B                                             | identified by similarity to GP:3212819; match to protein family HMM PF01123; match to protein family HMM PF02876                                                                           |
| SACOL0153 |       | 2.62 | hypothetical protein                                      | identified by match to protein family HMM PF04304                                                                                                                                          |
| SACOL2386 |       | 2.59 | nitrite extrusion protein                                 | identified by similarity to EGAD:30454; match to protein family HMM PF07690                                                                                                                |
| SACOL0995 |       | 2.58 | oligopeptide ABC transporter oligopeptide-binding protein | identified by match to protein family HMM PF00496                                                                                                                                          |
| SACOL1182 | arcC1 | 2.58 | carbamate kinase                                          | catalyzes the reversible synthesis of carbamate and ATP from carbamoyl phosphate and ADP                                                                                                   |
| SACOL0991 | oppB  | 2.57 | oligopeptide ABC transporter permease                     | identified by match to protein family HMM PF00528                                                                                                                                          |
| SACOL2392 | narI  | 2.56 | respiratory nitrate reductase subunit gamma               | identified by similarity to EGAD:30704; match to protein family HMM PF02665; match to protein family HMM TIGR00351                                                                         |
| SACOL2628 | betB  | 2.56 | betaine aldehyde dehydrogenase                            | identified by similarity to EGAD:97843; match to protein family HMM PF00171; match to protein family HMM TIGR01804                                                                         |
| SACOL2147 |       | 2.55 | BglG family transcriptional antiterminator                | identified by match to protein family HMM PF00874                                                                                                                                          |
| SACOL2399 | nirR  | 2.53 | transcriptional regulator NirR                            | identified by similarity to GP:4433637                                                                                                                                                     |
| SACOL2145 | glmS  | 2.52 | glucosamine-fructose-6-phosphate aminotransferase         | Catalyzes the first step in hexosamine metabolism, converting fructose-6P into glucosamine-6P using glutamine as a nitrogen source                                                         |
| SACOL1847 |       | 2.52 | hypothetical protein                                      | identified by similarity to EGAD:108623                                                                                                                                                    |
| SACOL2391 |       | 2.51 | hypothetical protein                                      | identified by similarity to GB:AAO05612.1                                                                                                                                                  |
| SACOL2531 |       | 2.51 | MarR family transcriptional regulator                     | identified by match to protein family HMM PF01047                                                                                                                                          |
| SACOL1711 |       | 2.50 | DNA-3-methyladenine glycosylase                           | identified by similarity to EGAD:6433; match to protein family HMM PF03352                                                                                                                 |
| SACOL2521 |       | 2.49 | transporter                                               | identified by match to protein family HMM PF07690                                                                                                                                          |
| SACOL2045 | ilvC  | 2.49 | ketol-acid reductoisomerase                               | catalyzes the formation of (R)-2,3-dihydroxy-3-methylbutanoate from (S)-2-hydroxy-2-methyl-3-oxobutanoate in valine and isoleucine biosynthesis                                            |
| SACOL2397 | nirD  | 2.48 | nitrite reductase [NAD(P)H], small subunit                | identified by similarity to EGAD:30823; match to protein family HMM PF00355                                                                                                                |
| SACOL0993 | oppD  | 2.47 | oligopeptide ABC transporter ATP-binding protein          | identified by match to protein family HMM PF00005; match to protein family HMM TIGR01727                                                                                                   |
| SACOL2026 | agrA  | 2.46 | accessory gene regulator protein A                        | identified by similarity to EGAD:16137; match to protein family HMM PF00072; match to protein family HMM PF04397                                                                           |
| SACOL0402 |       | 2.46 | PTS system, IIA component                                 | identified by match to protein family HMM PF00359                                                                                                                                          |
| SACOL0205 | pflA  | 2.45 | pyruvate formate-lyase-activating enzyme                  | identified by similarity to SP:O68575; match to protein family HMM PF04055                                                                                                                 |
| SACOL2651 |       | 2.45 | tributyryn esterase EstA                                  | identified by similarity to GP:7453516; similarity to OMNI:NTL01LL1811; match to protein family HMM PF00756                                                                                |
| SACOL2661 |       | 2.43 | hypothetical protein                                      | identified by similarity to GB:AAO05863.1                                                                                                                                                  |



**Supplemental Table 2: Genes with significantly altered expression in response to ZnO-NPs**

|           |       |      |                                                                    |                                                                                                                                                                      |
|-----------|-------|------|--------------------------------------------------------------------|----------------------------------------------------------------------------------------------------------------------------------------------------------------------|
| SACOL1432 | dapD  | 2.43 | 2,3,4,5-tetrahydropyridine-2,6-dicarboxylate N-succinyltransferase | identified by similarity to EGAD:165602; match to protein family HMM PF00132                                                                                         |
| SACOL2046 | leuA  | 2.42 | 2-isopropylmalate synthase                                         | catalyzes the formation of 2-isopropylmalate from acetyl-CoA and 2-oxoisovalerate in leucine biosynthesis                                                            |
| SACOL1431 | dapB  | 2.42 | dihydrodipicolinate reductase                                      | catalyzes the reduction of 2,3-dihydrodipicolinate to 2,3,4,5-tetrahydrodipicolinate in lysine and diaminopimelate biosynthesis                                      |
| SACOL2199 | budB  | 2.42 | acetolactate synthase                                              | catalyzes the formation of 2-acetolactate from pyruvate in stationary phase                                                                                          |
| SACOL0718 |       | 2.42 | ABC transporter ATP-binding protein                                | identified by similarity to EGAD:108398; match to protein family HMM PF00005                                                                                         |
| SACOL1596 | aroK  | 2.42 | shikimate kinase                                                   | identified by similarity to EGAD:29699; match to protein family HMM PF01202                                                                                          |
| SACOL1430 | dapA  | 2.41 | dihydrodipicolinate synthase                                       | catalyzes the formation of dihydrodipicolinate from L-aspartate 4-semialdehyde and pyruvate in lysine and diaminopimelate biosynthesis                               |
| SACOL2047 | leuB  | 2.41 | 3-isopropylmalate dehydrogenase                                    | catalyzes the oxidation of 3-isopropylmalate to 3-carboxy-4-methyl-2-oxopentanoate in leucine biosynthesis                                                           |
| SACOL0821 |       | 2.39 | HD domain-containing protein                                       |                                                                                                                                                                      |
| SACOL2632 | cudT  | 2.38 | BCCT family osmoprotectant transporter                             | identified by similarity to EGAD:45763; match to protein family HMM PF02028; match to protein family HMM TIGR00842                                                   |
| SACOL2389 |       | 2.37 | transcriptional regulatory protein DegU                            | identified by match to protein family HMM PF00072; match to protein family HMM PF00196                                                                               |
| SACOL0516 |       | 2.37 | PTS system, IIBC components                                        | identified by match to protein family HMM PF00367; match to protein family HMM PF02378; match to protein family HMM TIGR00826; match to protein family HMM TIGR01992 |
| SACOL2333 |       | 2.34 | hypothetical protein                                               | identified by match to protein family HMM PF02694                                                                                                                    |
| SACOL1350 |       | 2.34 | hypothetical protein                                               | identified by similarity to GB:AAO04593.1                                                                                                                            |
| SACOL1043 |       | 2.33 | glycosyl transferase, group 1 family protein                       | identified by match to protein family HMM PF00534                                                                                                                    |
| SACOL2627 | betA  | 2.33 | choline dehydrogenase                                              | catalyzes the oxidation of choline to betaine aldehyde and betain aldehyde to glycine betaine                                                                        |
| SACOL2049 | leuD  | 2.32 | isopropylmalate isomerase small subunit                            | catalyzes the isomerization between 2-isopropylmalate and 3-isopropylmalate in leucine biosynthesis; forms a heterodimer of LeuC/D                                   |
| SACOL2050 | ilvA2 | 2.31 | threonine dehydratase                                              | catalyzes the formation of 2-oxobutanoate from L-threonine; biosynthetic                                                                                             |
| SACOL2390 |       | 2.30 | sensory box histidine kinase                                       | identified by match to protein family HMM PF02518                                                                                                                    |
| SACOL2458 |       | 2.30 | amino acid permease                                                | identified by match to protein family HMM PF00324                                                                                                                    |
| SACOL2167 |       | 2.28 | iron compound ABC transporter iron compound-binding protein        | identified by match to protein family HMM PF01497                                                                                                                    |
| SACOL1397 | msrA  | 2.28 | methionine sulfoxide reductase A                                   | this stereospecific enzymes reduces the S isomer of methionine sulfoxide while MsrB reduces the R form; provides protection against oxidative stress                 |
| SACOL2535 |       | 2.27 | D-lactate dehydrogenase                                            | catalyzes the formation of pyruvate from lactate                                                                                                                     |
| SACOL2676 |       | 2.27 | LPXTG cell wall surface anchor family protein                      | identified by match to protein family HMM PF00746; match to protein family HMM PF05345; match to protein family HMM TIGR01167                                        |
| SACOL2565 |       | 2.26 | FeoA domain-containing protein                                     | identified by match to protein family HMM PF04023                                                                                                                    |
| SACOL2519 |       | 2.25 | hypothetical protein                                               |                                                                                                                                                                      |
| SACOL2322 |       | 2.23 | M20/M25/M40 family peptidase                                       | identified by match to protein family HMM PF01546; match to protein family HMM PF07687; match to protein family HMM TIGR01891                                        |
| SACOL0204 | pflB  | 2.22 | formate acetyltransferase                                          | identified by similarity to SP:P09373; match to protein family HMM PF01228; match to protein family HMM PF02901; match to protein family HMM TIGR01255               |
| SACOL0992 | oppC  | 2.22 | oligopeptide ABC transporter permease                              | identified by match to protein family HMM PF00528                                                                                                                    |
| SACOL2660 | isaB  | 2.22 | immunodominant antigen B                                           |                                                                                                                                                                      |
| SACOL1362 | hom   | 2.21 | homoserine dehydrogenase                                           | catalyzes the formation of L-aspartate 4-semialdehyde from L-homoserine                                                                                              |
| SACOL1060 |       | 2.19 | MarR family transcriptional regulator                              | identified by match to protein family HMM PF01047                                                                                                                    |
| SACOL1171 |       | 2.19 | hypothetical protein                                               |                                                                                                                                                                      |
| SACOL0796 |       | 2.18 | iron compound ABC transporter permease                             | identified by similarity to EGAD:37681; match to protein family HMM PF01032                                                                                          |
| SACOL0708 |       | 2.17 | DAK2 domain-containing protein                                     | identified by similarity to OMNI:NTL01BH3400; match to protein family HMM PF02734; match to protein family HMM TIGR02365                                             |
| SACOL1816 | putA  | 2.17 | proline dehydrogenase                                              | identified by match to protein family HMM PF01619                                                                                                                    |
| SACOL0007 |       | 2.17 | hypothetical protein                                               | identified by similarity to EGAD:21908; match to protein family HMM PF01256                                                                                          |
| SACOL2550 |       | 2.16 | hypothetical protein                                               |                                                                                                                                                                      |
| SACOL1363 | thrC  | 2.16 | threonine synthase                                                 | catalyzes the formation of L-threonine from O-phospho-L-homoserine                                                                                                   |
| SACOL0871 |       | 2.15 | hypothetical protein                                               |                                                                                                                                                                      |
| SACOL0458 | xpt   | 2.15 | xanthine phosphoribosyltransferase                                 | Catalyzes the transfer of the phosphoribosyl moiety from 5-phospho--D-ribose-1-pyrophosphate (PRib-PP) to the 6-oxo-guanine and -xanthine                            |
| SACOL2618 | ldh2  | 2.13 | L-lactate dehydrogenase                                            | identified by similarity to EGAD:16887; match to protein family HMM PF00056; match to protein family HMM PF02866; match to protein family HMM TIGR01771              |
| SACOL0176 |       | 2.13 | hypothetical protein                                               | identified by match to protein family HMM PF05913                                                                                                                    |
| SACOL2304 |       | 2.13 | hypothetical protein                                               |                                                                                                                                                                      |
| SACOL2451 |       | 2.13 | amino acid ABC transporter amino acid-binding protein              | identified by match to protein family HMM PF04069                                                                                                                    |
| SACOL2048 | leuC  | 2.13 | isopropylmalate isomerase large subunit                            | dehydratase component, catalyzes the isomerization between 2-isopropylmalate and 3-isopropylmalate                                                                   |

**Supplemental Table 2: Genes with significantly altered expression in response to ZnO-NPs**

|           |       |      |                                                           |                                                                                                                                                                                                                                                                          |
|-----------|-------|------|-----------------------------------------------------------|--------------------------------------------------------------------------------------------------------------------------------------------------------------------------------------------------------------------------------------------------------------------------|
| SACOL1556 |       | 2.12 | hypothetical protein                                      |                                                                                                                                                                                                                                                                          |
| SACOL1659 |       | 2.12 | hypothetical protein                                      | identified by similarity to GP:10174438; similarity to OMNI:NTL01BH1823                                                                                                                                                                                                  |
| SACOL2569 |       | 2.12 | 1-pyrroline-5-carboxylate dehydrogenase                   | catalyzes the conversion of 1-proline-5-carboxylate dehydrogenase to L-glutamate                                                                                                                                                                                         |
| SACOL0660 | adhP  | 2.11 | alcohol dehydrogenase                                     | similar to zinc-dependent eukaryotic ADH enzymes and distinct from fermentative ADHs                                                                                                                                                                                     |
| SACOL0009 | serS  | 2.11 | seryl-tRNA synthetase                                     | catalyzes a two-step reaction, first charging a serine molecule by linking its carboxyl group to the alpha-phosphate of ATP, followed by transfer of the aminoacyl-adenylate to its tRNA                                                                                 |
| SACOL2453 |       | 2.10 | amino acid ABC transporter ATP-binding protein            | identified by match to protein family HMM PF00005; match to protein family HMM PF00571; match to protein family HMM TIGR01186                                                                                                                                            |
| SACOL0599 |       | 2.09 | hypothetical protein                                      | identified by similarity to OMNI:NT01TA1215                                                                                                                                                                                                                              |
| SACOL2125 |       | 2.08 | M20/M25/M40 family peptidase                              | identified by match to protein family HMM PF01546; match to protein family HMM PF07687; match to protein family HMM TIGR01891                                                                                                                                            |
| SACOL1783 | acs   | 2.07 | acetyl-CoA synthetase                                     | Acs; catalyzes the conversion of acetate and CoA to acetyl-CoA                                                                                                                                                                                                           |
| SACOL1742 | gltA  | 2.07 | citrate synthase                                          | catalyzes the formation of citrate from acetyl-CoA and oxaloacetate                                                                                                                                                                                                      |
| SACOL0703 |       | 2.07 | hypothetical protein                                      | identified by similarity to EGAD:108622; match to protein family HMM PF02588                                                                                                                                                                                             |
| SACOL0111 |       | 2.06 | acetoin reductase                                         | identified by match to protein family HMM PF00106                                                                                                                                                                                                                        |
| SACOL1175 |       | 2.06 | hypothetical protein                                      |                                                                                                                                                                                                                                                                          |
| SACOL1020 |       | 2.05 | hypothetical protein                                      | similar to 2'-5' RNA ligase                                                                                                                                                                                                                                              |
| SACOL2324 | hutU  | 2.04 | urocanate hydratase                                       | catalyzes the formation of 4-imidazolone-5-propanoate from urocanate during histidine metabolism                                                                                                                                                                         |
| SACOL0689 |       | 2.04 | ABC transporter permease                                  | identified by match to protein family HMM PF00950                                                                                                                                                                                                                        |
| SACOL2319 |       | 2.03 | Na <sup>+</sup> /H <sup>+</sup> antiporter family protein | identified by similarity to OMNI:VCA0193; match to protein family HMM PF03553                                                                                                                                                                                            |
| SACOL1366 |       | 2.03 | hypothetical protein                                      | identified by similarity to GB:AAO04611.1                                                                                                                                                                                                                                |
| SACOL0934 |       | 2.03 | hypothetical protein                                      | identified by similarity to GB:AAO04220.1                                                                                                                                                                                                                                |
| SACOL0700 | abcA  | 2.02 | ABC transporter ATP-binding protein/permease              | identified by match to protein family HMM PF00005; match to protein family HMM PF00664                                                                                                                                                                                   |
| SACOL2011 |       | 2.01 | sodium transport family protein                           | identified by match to protein family HMM PF02386                                                                                                                                                                                                                        |
| SACOL2516 | gntR  | 2.01 | gluconate operon transcriptional repressor                | identified by similarity to EGAD:17516; match to protein family HMM PF00392                                                                                                                                                                                              |
| SACOL2620 |       | 2.00 | 4-aminobutyrate aminotransferase                          | catalyzes the formation of succinate semialdehyde and glutamate from 4-aminobutanoate and 2-oxoglutarate                                                                                                                                                                 |
| SACOL0688 |       | 1.98 | ABC transporter substrate-binding protein                 | identified by match to protein family HMM PF01297                                                                                                                                                                                                                        |
| SACOL2448 |       | 1.98 | 2-dehydropantoate 2-reductase                             | ketopantoate reductase; catalyzes the NADPH reduction of ketopantoate to pantoate; functions in pantothenate (vitamin B5) biosynthesis                                                                                                                                   |
| SACOL2718 |       | 1.97 | anion transporter family protein                          | identified by match to protein family HMM PF00939; match to protein family HMM TIGR00785                                                                                                                                                                                 |
| SACOL2059 |       | 1.97 | hypothetical protein                                      |                                                                                                                                                                                                                                                                          |
| SACOL0314 |       | 1.96 | hypothetical protein                                      | identified by similarity to EGAD:15022; match to protein family HMM PF01380                                                                                                                                                                                              |
| SACOL0494 | nuoF  | 1.95 | NADH dehydrogenase subunit 5                              | Catalyzes the transfer of electrons from NADH to ubiquinone                                                                                                                                                                                                              |
| SACOL1151 |       | 1.95 | hypothetical protein                                      | identified by similarity to EGAD:107725; match to protein family HMM PF05164                                                                                                                                                                                             |
| SACOL0609 | sdrD  | 1.95 | sdrD protein                                              | identified by similarity to GP:3550594; match to protein family HMM PF00746; match to protein family HMM PF02412; match to protein family HMM PF04650; match to protein family HMM PF05738; match to protein family HMM TIGR01167; match to protein family HMM TIGR01168 |
| SACOL1981 |       | 1.95 | isochorismatase                                           | identified by match to protein family HMM PF00857                                                                                                                                                                                                                        |
| SACOL0245 | lytS  | 1.94 | sensor histidine kinase LytS                              | identified by similarity to EGAD:42940; match to protein family HMM PF02518; match to protein family HMM PF06580; match to protein family HMM PF07694                                                                                                                    |
| SACOL0709 |       | 1.94 | phosphotransferase mannose-specific family component IIA  | identified by similarity to OMNI:NTL01LL0257; match to protein family HMM PF03610; match to protein family HMM TIGR02364                                                                                                                                                 |
| SACOL2407 |       | 1.93 | lipoprotein                                               | identified by similarity to EGAD:109043; match to protein family HMM PF01323                                                                                                                                                                                             |
| SACOL0027 |       | 1.93 | hypothetical protein                                      |                                                                                                                                                                                                                                                                          |
| SACOL1181 | arcB1 | 1.92 | ornithine carbamoyltransferase                            | catalyzes the formation of L-citrulline from carbamoyl phosphate and L-ornithine in arginine biosynthesis and degradation                                                                                                                                                |
| SACOL1660 |       | 1.91 | LamB/YcsF family protein                                  | identified by match to protein family HMM PF03746                                                                                                                                                                                                                        |
| SACOL2552 |       | 1.91 | PTS system, IIABC components                              | identified by match to protein family HMM PF00358; match to protein family HMM PF00367; match to protein family HMM PF02378; match to protein family HMM TIGR00826; match to protein family HMM TIGR00830; match to protein family HMM TIGR02002                         |
| SACOL0961 | gluD  | 1.91 | glutamate dehydrogenase                                   | identified by match to protein family HMM PF00208; match to protein family HMM PF02812                                                                                                                                                                                   |
| SACOL0546 | pth   | 1.91 | peptidyl-tRNA hydrolase                                   | Enables the recycling of peptidyl-tRNAs produced at termination of translation                                                                                                                                                                                           |
| SACOL0960 | rocD  | 1.91 | ornithine--oxo-acid transaminase                          | identified by similarity to EGAD:21835; match to protein family HMM PF00202; match to protein family HMM TIGR01885                                                                                                                                                       |
| SACOL0208 |       | 1.90 | hypothetical protein                                      |                                                                                                                                                                                                                                                                          |
| SACOL1033 |       | 1.90 | hypothetical protein                                      |                                                                                                                                                                                                                                                                          |
| SACOL0766 | saeR  | 1.90 | DNA-binding response regulator SaeR                       | identified by similarity to GP:5726300; match to protein family HMM PF00072; match to protein family HMM PF00486                                                                                                                                                         |
| SACOL2021 |       | 1.90 | carbon-nitrogen family hydrolase                          | identified by match to protein family HMM PF00795                                                                                                                                                                                                                        |

**Supplemental Table 2: Genes with significantly altered expression in response to ZnO-NPs**

|           |       |      |                                                            |                                                                                                                                                                                                                                                                                                                                                                                                                               |
|-----------|-------|------|------------------------------------------------------------|-------------------------------------------------------------------------------------------------------------------------------------------------------------------------------------------------------------------------------------------------------------------------------------------------------------------------------------------------------------------------------------------------------------------------------|
| SACOL1451 | arlR  | 1.90 | DNA-binding response regulator ArlR                        | identified by similarity to GP:9230552; similarity to OMNI:SA1451; match to protein family HMM PF00072; match to protein family HMM PF00486                                                                                                                                                                                                                                                                                   |
| SACOL0459 | pbuX  | 1.89 | xanthine permease                                          | identified by similarity to EGAD:30678; match to protein family HMM PF00860; match to protein family HMM TIGR00801                                                                                                                                                                                                                                                                                                            |
| SACOL1908 | fumC  | 1.89 | fumarate hydratase                                         | class II family (does not require metal); tetrameric enzyme; fumarase C; reversibly converts (S)-malate to fumarate and water; functions in the TCA cycle                                                                                                                                                                                                                                                                     |
| SACOL0403 |       | 1.89 | BglG family transcriptional antiterminator                 | identified by match to protein family HMM PF00359; match to protein family HMM PF00874                                                                                                                                                                                                                                                                                                                                        |
| SACOL0730 |       | 1.87 | hypothetical protein                                       | identified by similarity to EGAD:173390; match to protein family HMM PF04167                                                                                                                                                                                                                                                                                                                                                  |
| SACOL1113 |       | 1.86 | hypothetical protein                                       |                                                                                                                                                                                                                                                                                                                                                                                                                               |
| SACOL2154 | rocF  | 1.86 | arginase                                                   | identified by similarity to EGAD:14086; match to protein family HMM PF00491; match to protein family HMM TIGR01229                                                                                                                                                                                                                                                                                                            |
| SACOL0012 |       | 1.85 | homoserine O-acetyltransferase                             | identified by match to protein family HMM PF00561                                                                                                                                                                                                                                                                                                                                                                             |
| SACOL2198 | budA1 | 1.84 | alpha-acetolactate decarboxylase                           | identified by similarity to EGAD:17067; match to protein family HMM PF03306; match to protein family HMM TIGR01252                                                                                                                                                                                                                                                                                                            |
| SACOL1351 | cls1  | 1.84 | cardiolipin synthetase                                     | identified by similarity to SP:O66043; match to protein family HMM PF00614                                                                                                                                                                                                                                                                                                                                                    |
| SACOL2331 |       | 1.84 | hypothetical protein                                       |                                                                                                                                                                                                                                                                                                                                                                                                                               |
| SACOL1988 |       | 1.84 | hypothetical protein                                       | identified by match to protein family HMM PF03417                                                                                                                                                                                                                                                                                                                                                                             |
| SACOL0456 |       | 1.84 | hypothetical protein                                       | identified by similarity to GB:AAO05995.1                                                                                                                                                                                                                                                                                                                                                                                     |
| SACOL1349 |       | 1.83 | hypothetical protein                                       | identified by similarity to OMNI:PG0474                                                                                                                                                                                                                                                                                                                                                                                       |
| SACOL0460 | guaB  | 1.83 | inosine-5'-monophosphate dehydrogenase                     | identified by similarity to SP:P21879; match to protein family HMM PF00478; match to protein family HMM PF00571; match to protein family HMM TIGR01302                                                                                                                                                                                                                                                                        |
| SACOL2188 | lacR  | 1.83 | lactose phosphotransferase system repressor                | identified by similarity to SP:P16644; match to protein family HMM PF00455                                                                                                                                                                                                                                                                                                                                                    |
| SACOL1147 |       | 1.83 | RNA methyltransferase                                      | identified by match to protein family HMM PF00588                                                                                                                                                                                                                                                                                                                                                                             |
| SACOL0301 |       | 1.82 | formate/nitrite transporter family protein                 | identified by match to protein family HMM PF01226                                                                                                                                                                                                                                                                                                                                                                             |
| SACOL0096 | sarS  | 1.82 | accessory regulator S                                      | identified by similarity to OMNI:SA0096; match to protein family HMM TIGR01889                                                                                                                                                                                                                                                                                                                                                |
| SACOL0750 |       | 1.82 | anion transporter family protein                           | identified by match to protein family HMM PF00939; match to protein family HMM TIGR00785                                                                                                                                                                                                                                                                                                                                      |
| SACOL0215 |       | 1.82 | propionate CoA-transferase                                 | identified by match to protein family HMM PF01144                                                                                                                                                                                                                                                                                                                                                                             |
| SACOL0320 |       | 1.82 | hypothetical protein                                       |                                                                                                                                                                                                                                                                                                                                                                                                                               |
| SACOL1324 |       | 1.81 | hfq protein                                                | identified by similarity to EGAD:12661; match to protein family HMM PF01423                                                                                                                                                                                                                                                                                                                                                   |
| SACOL2615 | panB  | 1.81 | 3-methyl-2-oxobutanoate hydroxymethyltransferase           | catalyzes the formation of tetrahydrofolate and 2-dehydropantoate from 5,10-methylenetetrahydrofolate and 3-methyl-2-oxobutanoate                                                                                                                                                                                                                                                                                             |
| SACOL2086 |       | 1.81 | TenA family transcription regulator                        | identified by similarity to EGAD:24145; match to protein family HMM PF03070                                                                                                                                                                                                                                                                                                                                                   |
| SACOL1450 | arlS  | 1.81 | sensor histidine kinase ArlS                               | identified by similarity to GP:9230553; similarity to OMNI:SA1450; match to protein family HMM PF00512; match to protein family HMM PF00672; match to protein family HMM PF02518                                                                                                                                                                                                                                              |
| SACOL1308 |       | 1.81 | pyruvate ferredoxin oxidoreductase subunit alpha           | identified by match to protein family HMM PF01558; match to protein family HMM PF01855                                                                                                                                                                                                                                                                                                                                        |
| SACOL2070 | kdpD  | 1.80 | sensor histidine kinase KdpD                               | identified by similarity to EGAD:149594; match to protein family HMM PF00512; match to protein family HMM PF02518; match to protein family HMM PF02702                                                                                                                                                                                                                                                                        |
| SACOL2272 | modA  | 1.80 | molybdenum ABC transporter molybdenum-binding protein ModA | identified by similarity to EGAD:13554; match to protein family HMM PF01547; match to protein family HMM TIGR01256                                                                                                                                                                                                                                                                                                            |
| SACOL2505 |       | 1.80 | cell wall surface anchor family protein                    | identified by match to protein family HMM PF00746; match to protein family HMM PF04650; match to protein family HMM PF07501; match to protein family HMM TIGR01167; match to protein family HMM TIGR01168                                                                                                                                                                                                                     |
| SACOL0190 | acpD  | 1.80 | azoreductase                                               | FMN-dependent; requires NADH; catalyzes the cleavage of azo bond in aromatic azo compounds                                                                                                                                                                                                                                                                                                                                    |
| SACOL2514 | gntP  | 1.79 | gluconate transporter, permease                            | identified by similarity to EGAD:19179; match to protein family HMM PF02447; match to protein family HMM TIGR00791                                                                                                                                                                                                                                                                                                            |
| SACOL0466 |       | 1.79 | hypothetical protein                                       | identified by match to protein family HMM PF06993                                                                                                                                                                                                                                                                                                                                                                             |
| SACOL2452 |       | 1.79 | amino acid ABC transporter permease                        | identified by match to protein family HMM PF00528                                                                                                                                                                                                                                                                                                                                                                             |
| SACOL1434 |       | 1.79 | alanine racemase                                           | identified by match to protein family HMM PF00842; match to protein family HMM PF01168                                                                                                                                                                                                                                                                                                                                        |
| SACOL2437 | bcr   | 1.78 | bicyclomycin resistance protein                            | identified by similarity to SP:P28246; match to protein family HMM PF00083; match to protein family HMM PF07690; match to protein family HMM TIGR00710                                                                                                                                                                                                                                                                        |
| SACOL2585 |       | 1.77 | hypothetical protein                                       |                                                                                                                                                                                                                                                                                                                                                                                                                               |
| SACOL1338 |       | 1.77 | hypothetical protein                                       |                                                                                                                                                                                                                                                                                                                                                                                                                               |
| SACOL1661 |       | 1.76 | acetyl-CoA carboxylase, biotin carboxylase                 | identified by similarity to SP:P49787; match to protein family HMM PF00289; match to protein family HMM PF02785; match to protein family HMM PF02786                                                                                                                                                                                                                                                                          |
| SACOL0244 | scdA  | 1.76 | cell wall biosynthesis protein ScdA                        | involved in peptidoglycan cross-linking                                                                                                                                                                                                                                                                                                                                                                                       |
| SACOL1323 | miaA  | 1.75 | tRNA delta(2)-isopentenylpyrophosphate transferase         | IPP transferase; isopentenyltransferase; involved in tRNA modification; in Escherichia coli this enzyme catalyzes the addition of a delta2-isopentenyl group from dimethylallyl diphosphate to the N6-nitrogen of adenosine adjacent to the anticodon of tRNA species that read codons starting with uracil; further tRNA modifications may occur; mutations in miaA result in defects in translation efficiency and fidelity |
| SACOL1165 |       | 1.75 | hypothetical protein                                       |                                                                                                                                                                                                                                                                                                                                                                                                                               |
| SACOL1321 | glpD  | 1.75 | aerobic glycerol-3-phosphate dehydrogenase                 | identified by similarity to EGAD:18115; match to protein family HMM PF01266                                                                                                                                                                                                                                                                                                                                                   |

**Supplemental Table 2: Genes with significantly altered expression in response to ZnO-NPs**

|           |       |      |                                                                                                            |                                                                                                                                                                                                                                                                                                                                                                                        |
|-----------|-------|------|------------------------------------------------------------------------------------------------------------|----------------------------------------------------------------------------------------------------------------------------------------------------------------------------------------------------------------------------------------------------------------------------------------------------------------------------------------------------------------------------------------|
| SACOL1850 |       | 1.75 | hypothetical protein                                                                                       |                                                                                                                                                                                                                                                                                                                                                                                        |
| SACOL2449 |       | 1.75 | drug transporter                                                                                           | identified by match to protein family HMM PF00083; match to protein family HMM PF07690                                                                                                                                                                                                                                                                                                 |
| SACOL1010 | relA1 | 1.74 | GTP pyrophosphokinase                                                                                      | identified by match to protein family HMM PF04607                                                                                                                                                                                                                                                                                                                                      |
| SACOL2587 |       | 1.74 | hypothetical protein                                                                                       |                                                                                                                                                                                                                                                                                                                                                                                        |
| SACOL0724 |       | 1.74 | hypothetical protein                                                                                       | identified by similarity to GB:AAO04031.1                                                                                                                                                                                                                                                                                                                                              |
| SACOL1159 | sdhA  | 1.74 | succinate dehydrogenase flavoprotein subunit                                                               | part of four member succinate dehydrogenase enzyme complex that forms a trimeric complex (trimer of tetramers); SdhA/B are the catalytic subcomplex and can exhibit succinate dehydrogenase activity in the absence of SdhC/D which are the membrane components and form cytochrome b556; SdhC binds ubiquinone; oxidizes succinate to fumarate while reducing ubiquinone to ubiquinol |
| SACOL1072 | folD  | 1.74 | bifunctional 5,10-methylene-tetrahydrofolate dehydrogenase/ 5,10-methylene-tetrahydrofolate cyclohydrolase | catalyzes the formation of 5,10-methenyltetrahydrofolate from 5,10-methylenetetrahydrofolate and subsequent formation of 10-formyltetrahydrofolate from 5,10-methenyltetrahydrofolate                                                                                                                                                                                                  |
| SACOL0506 |       | 1.74 | ABC transporter substrate-binding protein                                                                  | identified by match to protein family HMM PF03180                                                                                                                                                                                                                                                                                                                                      |
| SACOL2294 |       | 1.73 | hypothetical protein                                                                                       |                                                                                                                                                                                                                                                                                                                                                                                        |
| SACOL0959 |       | 1.72 | Oye family NADH-dependent flavin oxidoreductase                                                            | identified by match to protein family HMM PF00724                                                                                                                                                                                                                                                                                                                                      |
| SACOL2345 |       | 1.72 | esterase                                                                                                   | identified by similarity to EGAD:16024                                                                                                                                                                                                                                                                                                                                                 |
| SACOL1368 | kataA | 1.72 | catalase                                                                                                   | identified by similarity to EGAD:29401; match to protein family HMM PF00199                                                                                                                                                                                                                                                                                                            |
| SACOL2133 |       | 1.71 | hypothetical protein                                                                                       | identified by similarity to GB:AAO05339.1                                                                                                                                                                                                                                                                                                                                              |
| SACOL1001 | trpS  | 1.71 | tryptophanyl-tRNA synthetase                                                                               | catalyzes a two-step reaction, first charging a tryptophan molecule by linking its carboxyl group to the alpha-phosphate of ATP, followed by transfer of the aminoacyl-adenylate to its tRNA                                                                                                                                                                                           |
| SACOL1776 |       | 1.71 | 1-acyl-sn-glycerol-3-phosphate acyltransferase                                                             | identified by match to protein family HMM PF01553; match to protein family HMM TIGR00530                                                                                                                                                                                                                                                                                               |
| SACOL2019 |       | 1.70 | sdrH protein                                                                                               | identified by similarity to GP:8101009                                                                                                                                                                                                                                                                                                                                                 |
| SACOL0667 |       | 1.70 | HAD superfamily hydrolase                                                                                  | identified by match to protein family HMM PF00702; match to protein family HMM TIGR01509; match to protein family HMM TIGR01549                                                                                                                                                                                                                                                        |
| SACOL2323 | hutI  | 1.70 | imidazolonepropionase                                                                                      | catalyzing the hydrolysis of 4-imidazolone-5-propionate to N-formimidoyl-L-glutamate, the third step in the histidine degradation pathway                                                                                                                                                                                                                                              |
| SACOL1812 | rot   | 1.70 | repressor of toxins                                                                                        | identified by similarity to GP:6651452; match to protein family HMM TIGR01889                                                                                                                                                                                                                                                                                                          |
| SACOL2483 |       | 1.70 | transporter                                                                                                | identified by match to protein family HMM PF03806                                                                                                                                                                                                                                                                                                                                      |
| SACOL2534 | frp   | 1.69 | NAD(P)H-flavin oxidoreductase                                                                              | identified by match to protein family HMM PF00881                                                                                                                                                                                                                                                                                                                                      |
| SACOL0920 |       | 1.69 | hypothetical protein                                                                                       |                                                                                                                                                                                                                                                                                                                                                                                        |
| SACOL0135 |       | 1.69 | bifunctional acetaldehyde-CoA/alcohol dehydrogenase                                                        | identified by similarity to SP:P17547; match to protein family HMM PF00465                                                                                                                                                                                                                                                                                                             |
| SACOL0271 |       | 1.69 | hypothetical protein                                                                                       | identified by match to protein family HMM PF06013                                                                                                                                                                                                                                                                                                                                      |
| SACOL1009 |       | 1.69 | hypothetical protein                                                                                       | identified by similarity to OMNI:NTL01BH2853                                                                                                                                                                                                                                                                                                                                           |
| SACOL2441 |       | 1.69 | amino acid permease                                                                                        | identified by match to protein family HMM PF00324                                                                                                                                                                                                                                                                                                                                      |
| SACOL1785 | acuC  | 1.69 | acetoin utilization protein AcuC                                                                           | identified by similarity to EGAD:19784; match to protein family HMM PF00850                                                                                                                                                                                                                                                                                                            |
| SACOL2332 | galM  | 1.68 | aldose 1-epimerase                                                                                         | identified by match to protein family HMM PF01263                                                                                                                                                                                                                                                                                                                                      |
| SACOL0312 | nanA  | 1.68 | N-acetylneuraminase lyase                                                                                  | catalyzes the formation of pyruvate and N-acetylmannosamine from N-acetylneuraminic acid                                                                                                                                                                                                                                                                                               |
| SACOL1222 | rpoZ  | 1.68 | DNA-directed RNA polymerase subunit omega                                                                  | Promotes RNA polymerase assembly; latches the N- and C-terminal regions of the beta' subunit thereby facilitating its interaction with the beta and alpha subunits                                                                                                                                                                                                                     |
| SACOL1167 |       | 1.68 | hypothetical protein                                                                                       |                                                                                                                                                                                                                                                                                                                                                                                        |
| SACOL1158 | sdhC  | 1.68 | succinate dehydrogenase, cytochrome b558 subunit                                                           | identified by similarity to EGAD:20778; match to protein family HMM TIGR02046                                                                                                                                                                                                                                                                                                          |
| SACOL0797 |       | 1.68 | iron compound ABC transporter permease                                                                     | identified by similarity to EGAD:37682; match to protein family HMM PF01032                                                                                                                                                                                                                                                                                                            |
| SACOL2715 |       | 1.68 | hypothetical protein                                                                                       |                                                                                                                                                                                                                                                                                                                                                                                        |
| SACOL0643 |       | 1.67 | hypothetical protein                                                                                       | identified by similarity to GP:11230708                                                                                                                                                                                                                                                                                                                                                |
| SACOL1935 |       | 1.67 | hypothetical protein                                                                                       | identified by similarity to GP:10173504; match to protein family HMM PF04055                                                                                                                                                                                                                                                                                                           |
| SACOL2607 |       | 1.67 | hypothetical protein                                                                                       |                                                                                                                                                                                                                                                                                                                                                                                        |
| SACOL2644 |       | 1.66 | ABC transporter ATP-binding protein                                                                        | identified by match to protein family HMM PF00005                                                                                                                                                                                                                                                                                                                                      |
| SACOL1393 |       | 1.66 | transcription antiterminator                                                                               | identified by similarity to SP:P39805; match to protein family HMM PF00874; match to protein family HMM PF03123                                                                                                                                                                                                                                                                        |
| SACOL2619 |       | 1.66 | amino acid permease                                                                                        | identified by match to protein family HMM PF00324                                                                                                                                                                                                                                                                                                                                      |
| SACOL2363 |       | 1.65 | L-lactate permease                                                                                         | identified by similarity to EGAD:8633; match to protein family HMM PF02652; match to protein family HMM TIGR00795                                                                                                                                                                                                                                                                      |
| SACOL2439 |       | 1.64 | hypothetical protein                                                                                       | identified by similarity to GB:AAO05643.1                                                                                                                                                                                                                                                                                                                                              |
| SACOL1848 |       | 1.64 | hypothetical protein                                                                                       |                                                                                                                                                                                                                                                                                                                                                                                        |
| SACOL0179 |       | 1.64 | RpiR family phosphosugar-binding transcriptional regulator                                                 | identified by match to protein family HMM PF01380; match to protein family HMM PF01418                                                                                                                                                                                                                                                                                                 |
| SACOL2143 |       | 1.64 | hypothetical protein                                                                                       | identified by similarity to GP:10174364; match to protein family HMM PF00702; match to protein family HMM TIGR00099; match to protein family HMM TIGR01484                                                                                                                                                                                                                             |

**Supplemental Table 2: Genes with significantly altered expression in response to ZnO-NPs**

|           |       |      |                                                               |                                                                                                                                                                                                                                                                                                                                                           |
|-----------|-------|------|---------------------------------------------------------------|-----------------------------------------------------------------------------------------------------------------------------------------------------------------------------------------------------------------------------------------------------------------------------------------------------------------------------------------------------------|
| SACOL1436 |       | 1.64 | hypothetical protein                                          |                                                                                                                                                                                                                                                                                                                                                           |
| SACOL0505 |       | 1.64 | ABC transporter permease                                      | identified by match to protein family HMM PF00528                                                                                                                                                                                                                                                                                                         |
| SACOL0307 | pfoR  | 1.64 | perfringolysin O regulator protein                            | identified by similarity to EGAD:33437                                                                                                                                                                                                                                                                                                                    |
| SACOL2124 |       | 1.64 | hypothetical protein                                          | identified by similarity to GB:AAO05329.1                                                                                                                                                                                                                                                                                                                 |
| SACOL1322 |       | 1.63 | alpha/beta fold family hydrolase                              | identified by match to protein family HMM PF00561                                                                                                                                                                                                                                                                                                         |
| SACOL1041 |       | 1.63 | hypothetical protein                                          |                                                                                                                                                                                                                                                                                                                                                           |
| SACOL1891 |       | 1.63 | RNAIII-activating protein TRAP                                | identified by similarity to OMNI:SA1891                                                                                                                                                                                                                                                                                                                   |
| SACOL0818 | prfB  | 1.63 | peptide chain release factor 2                                | recognizes the termination signals UGA and UAA during protein translation a specificity which is dependent on amino acid residues residing in loops of the L-shaped tRNA-like molecule of RF2; in some organisms control of PrfB protein levels is maintained through a +1 ribosomal frameshifting mechanism; this protein is similar to release factor 1 |
| SACOL1804 |       | 1.63 | polysaccharide biosynthesis protein                           | identified by match to protein family HMM PF01943                                                                                                                                                                                                                                                                                                         |
| SACOL1367 |       | 1.63 | amino acid permease                                           | identified by match to protein family HMM PF00324                                                                                                                                                                                                                                                                                                         |
| SACOL0788 |       | 1.63 | proton-dependent oligopeptide transporter family protein      | identified by match to protein family HMM PF00854; match to protein family HMM PF07690; match to protein family HMM TIGR00924                                                                                                                                                                                                                             |
| SACOL1591 |       | 1.63 | lipoate-protein ligase A family protein                       | identified by match to protein family HMM PF03099                                                                                                                                                                                                                                                                                                         |
| SACOL2058 |       | 1.63 | PemK family protein                                           | identified by similarity to GP:10834755; match to protein family HMM PF02452                                                                                                                                                                                                                                                                              |
| SACOL1161 | murl  | 1.63 | glutamate racemase                                            | converts L-glutamate to D-glutamate, a component of peptidoglycan                                                                                                                                                                                                                                                                                         |
| SACOL0394 |       | 1.62 | hypothetical protein                                          | identified by match to protein family HMM PF00296                                                                                                                                                                                                                                                                                                         |
| SACOL0600 | ilvE  | 1.62 | branched-chain amino acid aminotransferase                    | catalyzes the transamination of the branched-chain amino acids to their respective alpha-keto acids                                                                                                                                                                                                                                                       |
| SACOL2408 |       | 1.62 | lipoprotein                                                   | identified by similarity to GB:AAO05629.1                                                                                                                                                                                                                                                                                                                 |
| SACOL2567 |       | 1.62 | hypothetical protein                                          |                                                                                                                                                                                                                                                                                                                                                           |
| SACOL1734 | gapA2 | 1.62 | glyceraldehyde 3-phosphate dehydrogenase 2                    | identified by similarity to EGAD:107759; match to protein family HMM PF00044; match to protein family HMM PF02800; match to protein family HMM TIGR01534                                                                                                                                                                                                  |
| SACOL0720 |       | 1.62 | ABC transporter permease                                      |                                                                                                                                                                                                                                                                                                                                                           |
| SACOL0418 |       | 1.61 | mttA/Hcf106 family protein                                    | identified by match to protein family HMM PF02416; match to protein family HMM TIGR01411                                                                                                                                                                                                                                                                  |
| SACOL1031 |       | 1.61 | 5' nucleotidase                                               | identified by match to protein family HMM PF02872                                                                                                                                                                                                                                                                                                         |
| SACOL1826 |       | 1.61 | hypothetical protein                                          | identified by similarity to GB:AAN32737.1                                                                                                                                                                                                                                                                                                                 |
| SACOL1396 | fmtC  | 1.61 | fmtC protein                                                  | identified by match to protein family HMM PF04329; match to protein family HMM PF04330; match to protein family HMM PF04331                                                                                                                                                                                                                               |
| SACOL0616 | nagB  | 1.61 | glucosamine-6-phosphate isomerase                             | identified by similarity to EGAD:107403; match to protein family HMM PF01182                                                                                                                                                                                                                                                                              |
| SACOL0608 | sdrC  | 1.61 | sdrC protein                                                  | identified by similarity to GP:3550592; match to protein family HMM PF00746; match to protein family HMM PF04650; match to protein family HMM PF05738; match to protein family HMM TIGR01167; match to protein family HMM TIGR01168                                                                                                                       |
| SACOL0668 |       | 1.61 | alpha/beta fold family hydrolase                              | identified by match to protein family HMM PF00561                                                                                                                                                                                                                                                                                                         |
| SACOL1878 | epiA  | 1.61 | lantibiotic epidermin precursor EpiA                          | identified by similarity to EGAD:6281; match to protein family HMM PF02052                                                                                                                                                                                                                                                                                |
| SACOL0281 |       | 1.61 | hypothetical protein                                          |                                                                                                                                                                                                                                                                                                                                                           |
| SACOL1412 |       | 1.61 | hydrolase-like protein                                        | identified by match to protein family HMM TIGR00099; match to protein family HMM TIGR01484                                                                                                                                                                                                                                                                |
| SACOL1772 |       | 1.61 | class V aminotransferase                                      | identified by match to protein family HMM PF00266                                                                                                                                                                                                                                                                                                         |
| SACOL0513 | gltC  | 1.60 | transcriptional regulatory protein GltC                       | identified by similarity to EGAD:6257; match to protein family HMM PF00126                                                                                                                                                                                                                                                                                |
| SACOL2064 |       | 1.60 | hypothetical protein                                          |                                                                                                                                                                                                                                                                                                                                                           |
| SACOL2338 |       | 1.60 | hypothetical protein                                          |                                                                                                                                                                                                                                                                                                                                                           |
| SACOL0319 |       | 1.60 | hypothetical protein                                          |                                                                                                                                                                                                                                                                                                                                                           |
| SACOL1539 |       | 1.60 | hypothetical protein                                          | identified by similarity to EGAD:12647; match to protein family HMM PF03745                                                                                                                                                                                                                                                                               |
| SACOL0658 |       | 1.59 | HD domain-containing protein                                  | identified by match to protein family HMM PF01966                                                                                                                                                                                                                                                                                                         |
| SACOL1662 |       | 1.59 | acetyl-CoA carboxylase, biotin carboxyl carrier protein       | identified by similarity to SP:P49786; match to protein family HMM PF00364                                                                                                                                                                                                                                                                                |
| SACOL0171 | brnQ1 | 1.59 | branched-chain amino acid transport system II carrier protein | identified by match to protein family HMM PF05525; match to protein family HMM TIGR00796                                                                                                                                                                                                                                                                  |
| SACOL2369 |       | 1.59 | pyridine nucleotide-disulfide oxidoreductase                  | identified by match to protein family HMM PF00070                                                                                                                                                                                                                                                                                                         |
| SACOL0072 |       | 1.59 | hypothetical protein                                          | identified by match to protein family HMM PF00126; match to protein family HMM PF03466                                                                                                                                                                                                                                                                    |
| SACOL0632 |       | 1.59 | hypothetical protein                                          | identified by match to protein family HMM PF06738                                                                                                                                                                                                                                                                                                         |
| SACOL1221 | gmk   | 1.59 | guanylate kinase                                              | Essential for recycling GMP and indirectly, cGMP                                                                                                                                                                                                                                                                                                          |
| SACOL0166 |       | 1.59 | hypothetical protein                                          | identified by match to protein family HMM PF07274                                                                                                                                                                                                                                                                                                         |
| SACOL2541 |       | 1.59 | acetyltransferase                                             | identified by match to protein family HMM PF00583                                                                                                                                                                                                                                                                                                         |
| SACOL2078 |       | 1.58 | hypothetical protein                                          | identified by match to protein family HMM PF02583                                                                                                                                                                                                                                                                                                         |
| SACOL0161 |       | 1.58 | hypothetical protein                                          |                                                                                                                                                                                                                                                                                                                                                           |
| SACOL1842 |       | 1.58 | hypothetical protein                                          | identified by similarity to OMNI:NTL01BH2832; match to protein family HMM PF01809; match to protein family HMM TIGR00278                                                                                                                                                                                                                                  |

**Supplemental Table 2: Genes with significantly altered expression in response to ZnO-NPs**

|           |       |      |                                                        |                                                                                                                                                                                                                                    |
|-----------|-------|------|--------------------------------------------------------|------------------------------------------------------------------------------------------------------------------------------------------------------------------------------------------------------------------------------------|
| SACOL1797 |       | 1.58 | metallo-beta-lactamase                                 | identified by match to protein family HMM PF00753                                                                                                                                                                                  |
| SACOL2193 |       | 1.58 | MerR family transcriptional regulator                  | identified by match to protein family HMM PF00376                                                                                                                                                                                  |
| SACOL2502 |       | 1.58 | hypothetical protein                                   |                                                                                                                                                                                                                                    |
| SACOL1992 |       | 1.57 | hypothetical protein                                   | identified by similarity to GB:BAC14289.1                                                                                                                                                                                          |
| SACOL1304 | recA  | 1.57 | recombinase A                                          | catalyzes the hydrolysis of ATP in the presence of single-stranded DNA, the ATP-dependent uptake of single-stranded DNA by duplex DNA, and the ATP-dependent hybridization of homologous single-stranded DNAs                      |
| SACOL0566 | nupC  | 1.57 | nucleoside permease NupC                               | identified by similarity to EGAD:6216; match to protein family HMM PF01773; match to protein family HMM PF07662; match to protein family HMM PF07670                                                                               |
| SACOL1042 |       | 1.57 | hypothetical protein                                   |                                                                                                                                                                                                                                    |
| SACOL2527 |       | 1.57 | fructose-1,6-bisphosphatase                            | identified by similarity to EGAD:37656; match to protein family HMM PF06874                                                                                                                                                        |
| SACOL1364 | thrB  | 1.57 | homoserine kinase                                      | catalyzes the formation of O-phospho-L-homoserine from L-homoserine in threonine biosynthesis from aspartate                                                                                                                       |
| SACOL0514 | gltB  | 1.57 | glutamate synthase                                     | identified by similarity to EGAD:109137; match to protein family HMM PF01493; match to protein family HMM PF01645; match to protein family HMM PF04897; match to protein family HMM PF04898                                        |
| SACOL2442 |       | 1.57 | Na <sup>+</sup> /H <sup>+</sup> antiporter             | identified by match to protein family HMM PF00999                                                                                                                                                                                  |
| SACOL1037 |       | 1.56 | hypothetical protein                                   |                                                                                                                                                                                                                                    |
| SACOL1435 | lysA  | 1.56 | diaminopimelate decarboxylase                          | identified by similarity to SP:P23630; match to protein family HMM PF00278; match to protein family HMM PF02784; match to protein family HMM TIGR01048                                                                             |
| SACOL0870 |       | 1.56 | LysE/YggA family protein                               | identified by match to protein family HMM PF01810                                                                                                                                                                                  |
| SACOL2551 |       | 1.56 | hypothetical protein                                   | identified by similarity to OMNI:VC1938                                                                                                                                                                                            |
| SACOL2672 |       | 1.56 | hypothetical protein                                   | identified by similarity to GB:AAK17000.1                                                                                                                                                                                          |
| SACOL1374 | lexA  | 1.56 | LexA repressor                                         | Represses a number of genes involved in the response to DNA damage                                                                                                                                                                 |
| SACOL1164 |       | 1.56 | fibrinogen binding-like protein                        | identified by similarity to EGAD:16905                                                                                                                                                                                             |
| SACOL2673 |       | 1.55 | hypothetical protein                                   | identified by similarity to GB:AAK16999.1                                                                                                                                                                                          |
| SACOL2142 |       | 1.55 | SAP domain-containing protein                          |                                                                                                                                                                                                                                    |
| SACOL2296 |       | 1.55 | glycerate dehydrogenase                                | Catalyzes the reduction of hydroxypyruvate to form D-glycerate, using NADH as an electron donor                                                                                                                                    |
| SACOL1689 | relA2 | 1.55 | GTP pyrophosphokinase                                  | identified by similarity to EGAD:107375; match to protein family HMM PF01842; match to protein family HMM PF01966; match to protein family HMM PF02824; match to protein family HMM PF04607; match to protein family HMM TIGR00691 |
| SACOL0611 |       | 1.55 | glycosyl transferase, group 1 family protein           | identified by match to protein family HMM PF00534                                                                                                                                                                                  |
| SACOL0317 |       | 1.55 | lipase precursor, interruption-N                       | identified by similarity to EGAD:17843; match to protein family HMM PF04650; match to protein family HMM TIGR01168                                                                                                                 |
| SACOL2733 |       | 1.55 | hypothetical protein                                   | identified by similarity to GB:AAO06054.1                                                                                                                                                                                          |
| SACOL0455 |       | 1.54 | hypothetical protein                                   | identified by similarity to SP:Q8CQQ7                                                                                                                                                                                              |
| SACOL2549 |       | 1.54 | hypothetical protein                                   | identified by similarity to EGAD:16024                                                                                                                                                                                             |
| SACOL1645 |       | 1.54 | comE operon protein 2                                  | identified by similarity to EGAD:23914; match to protein family HMM PF00383                                                                                                                                                        |
| SACOL0756 |       | 1.54 | ebsC protein                                           | identified by similarity to SP:P36922; match to protein family HMM PF04073; match to protein family HMM TIGR00011                                                                                                                  |
| SACOL1058 |       | 1.54 | aminotransferase, class I                              | identified by match to protein family HMM PF00155                                                                                                                                                                                  |
| SACOL2450 |       | 1.54 | amino acid ABC transporter permease                    | identified by match to protein family HMM PF00528                                                                                                                                                                                  |
| SACOL1758 | ald2  | 1.54 | alanine dehydrogenase                                  | identified by similarity to EGAD:15508; match to protein family HMM PF01262; match to protein family HMM PF05222; match to protein family HMM TIGR00518                                                                            |
| SACOL0715 |       | 1.53 | hypothetical protein                                   | identified by similarity to GB:AAO04023.1                                                                                                                                                                                          |
| SACOL2639 | cysJ  | 1.53 | sulfite reductase (NADPH) flavoprotein alpha-component | identified by similarity to SP:P38038; match to protein family HMM PF00175; match to protein family HMM PF00258; match to protein family HMM PF00667; match to protein family HMM TIGR01931                                        |
| SACOL2144 |       | 1.53 | ABC transporter ATP-binding protein                    | identified by match to protein family HMM PF00005                                                                                                                                                                                  |
| SACOL0747 |       | 1.53 | cobalamin synthesis protein/P47K family protein        | identified by match to protein family HMM PF02492; match to protein family HMM PF07683                                                                                                                                             |
| SACOL0666 |       | 1.53 | iron compound ABC transporter permease                 | identified by match to protein family HMM PF01032                                                                                                                                                                                  |
| SACOL2658 |       | 1.53 | ArgR family transcriptional regulator                  | identified by similarity to EGAD:18464; match to protein family HMM PF02863                                                                                                                                                        |
| SACOL2522 |       | 1.53 | DedA family protein                                    | identified by match to protein family HMM PF00597                                                                                                                                                                                  |
| SACOL1549 | zwf   | 1.52 | glucose-6-phosphate 1-dehydrogenase                    | catalyzes the formation of D-glucono-1,5-lactone 6-phosphate from D-glucose 6-phosphate                                                                                                                                            |
| SACOL1448 | sucB  | 1.52 | dihydroliipoamide succinyltransferase                  | component of 2-oxoglutarate dehydrogenase complex; catalyzes the transfer of succinyl coenzyme A to form succinyl CoA as part of the conversion of 2-oxoglutarate to succinyl-CoA                                                  |
| SACOL2459 | pnbA  | 1.52 | para-nitrobenzyl esterase                              | identified by similarity to SP:P37967; match to protein family HMM PF00135                                                                                                                                                         |
| SACOL0180 |       | 1.52 | type I restriction-modification enzyme, R subunit      | identified by match to protein family HMM PF00270; match to protein family HMM PF04313; match to protein family HMM PF04851; match to protein family HMM TIGR00348                                                                 |
| SACOL1339 |       | 1.52 | hypothetical protein                                   |                                                                                                                                                                                                                                    |
| SACOL2491 |       | 1.51 | hypothetical protein                                   | identified by similarity to GB:AAO05679.1                                                                                                                                                                                          |

**Supplemental Table 2: Genes with significantly altered expression in response to ZnO-NPs**

|           |     |      |                                                    |                                                                                                                                                         |
|-----------|-----|------|----------------------------------------------------|---------------------------------------------------------------------------------------------------------------------------------------------------------|
| SACOL2562 | ogt | 1.51 | methylated-DNA--protein-cysteine methyltransferase | identified by similarity to EGAD:29038; match to protein family HMM PF01035; match to protein family HMM PF02870; match to protein family HMM TIGR00589 |
| SACOL2400 |     | 1.51 | acetyltransferase                                  | identified by match to protein family HMM PF00583                                                                                                       |
| SACOL1775 |     | 1.51 | PTS system, IIBC components                        | identified by match to protein family HMM PF00367; match to protein family HMM PF02378; match to protein family HMM TIGR01998                           |
| SACOL2077 |     | 1.51 | hypothetical protein                               | identified by similarity to GB:AAO05284.1; match to protein family HMM PF00403                                                                          |
| SACOL1307 |     | 1.51 | hypothetical protein                               | identified by similarity to EGAD:108574; match to protein family HMM PF00149; match to protein family HMM TIGR00282                                     |
| SACOL0512 |     | 1.51 | hypothetical protein                               |                                                                                                                                                         |
| SACOL0120 |     | 1.51 | GntR family transcriptional regulator              | identified by similarity to EGAD:37606; match to protein family HMM PF00392                                                                             |
| SACOL2278 |     | 1.51 | acyl-CoA dehydrogenase-like protein                | identified by match to protein family HMM PF00441; match to protein family HMM PF02770                                                                  |
| SACOL0612 |     | 1.51 | glycosyl transferase, group 1 family protein       | identified by match to protein family HMM PF00534                                                                                                       |
| SACOL1883 |     | 1.51 | hypothetical protein                               |                                                                                                                                                         |
| SACOL0751 |     | 1.50 | deoxyribodipyrimidine photolyase                   | identified by match to protein family HMM PF03441                                                                                                       |
| SACOL2063 |     | 1.50 | hypothetical protein                               | identified by match to protein family HMM PF03703                                                                                                       |

**Upregulated**

|           |      |       |                                                      |                                                                                                                                                                                                                                                                    |
|-----------|------|-------|------------------------------------------------------|--------------------------------------------------------------------------------------------------------------------------------------------------------------------------------------------------------------------------------------------------------------------|
| SACOL2186 |      | 16.75 | galactose-6-phosphate isomerase subunit LacA         | catalyzes the interconversion of galactose 6-phosphate to tagatose 6-phosphate; tagatose pathway for galactose utilization                                                                                                                                         |
| SACOL1217 | pyrE | 16.44 | orotate phosphoribosyltransferase                    | involved in fifth step of pyrimidine biosynthesis; converts orotidine 5'-phosphate and diphosphate to orotate and 5-phospho-alpha-D-ribose 1-diphosphate                                                                                                           |
| SACOL1215 | carB | 15.86 | carbamoyl phosphate synthase large subunit           | four CarB-CarA dimers form the carbamoyl phosphate synthetase holoenzyme that catalyzes the production of carbamoyl phosphate; CarB is responsible for the amidotransferase activity                                                                               |
| SACOL1216 | pyrF | 12.07 | orotidine 5'-phosphate decarboxylase                 | type 1 subfamily; involved in last step of pyrimidine biosynthesis; converts orotidine 5'-phosphate to UMP and carbon dioxide; OMP decarboxylase; OMPDCase; OMPdecase                                                                                              |
| SACOL1212 | pyrB | 10.95 | aspartate carbamoyltransferase catalytic subunit     | catalyzes the transfer of the carbamoyl moiety from carbamoyl phosphate to L-aspartate in pyrimidine biosynthesis                                                                                                                                                  |
| SACOL1214 | carA | 10.26 | carbamoyl phosphate synthase small subunit           | catalyzes production of carbamoyl phosphate from bicarbonate and glutamine in pyrimidine and arginine biosynthesis pathways; forms an octamer composed of four CarAB dimers                                                                                        |
| SACOL1213 | pyrC | 9.21  | dihydroorotase                                       | catalyzes the formation of N-carbamoyl-L-aspartate from (S)-dihydroorotate in pyrimidine biosynthesis                                                                                                                                                              |
| SACOL1211 | uraA | 4.76  | uracil permease                                      | identified by similarity to EGAD:20988; match to protein family HMM PF00860; match to protein family HMM TIGR00801                                                                                                                                                 |
| SACOL2185 | lacB | 4.75  | galactose-6-phosphate isomerase subunit LacB         | catalyzes the interconversion of galactose 6-phosphate to tagatose 6-phosphate                                                                                                                                                                                     |
| SACOL2572 |      | 3.61  | copper-translocating P-type ATPase                   | identified by match to protein family HMM PF00122; match to protein family HMM PF00403; match to protein family HMM PF00702; match to protein family HMM TIGR01494; match to protein family HMM TIGR01511; match to protein family HMM TIGR01525                   |
| SACOL2184 | lacC | 3.59  | tagatose-6-phosphate kinase                          | catalyzes the formation of tagatose 1,6-bisphosphate from tagatose 6-phosphate and ATP                                                                                                                                                                             |
| SACOL1218 |      | 3.54  | hypothetical protein                                 | identified by similarity to GB:AAO04479.1                                                                                                                                                                                                                          |
| SACOL0263 | lytM | 3.46  | peptidoglycan hydrolase                              | identified by similarity to GP:2239274; match to protein family HMM PF01551                                                                                                                                                                                        |
| SACOL2573 |      | 3.16  | copper ion binding protein                           | identified by match to protein family HMM PF00403; match to protein family HMM TIGR00003                                                                                                                                                                           |
| SACOL0439 | rpsR | 3.07  | 30S ribosomal protein S18                            | binds as a heterodimer with protein S6 to the central domain of the 16S rRNA; helps stabilize the platform of the 30S subunit                                                                                                                                      |
| SACOL0584 | rplA | 2.94  | 50S ribosomal protein L1                             | in Escherichia coli and Methanococcus, this protein autoregulates expression; the binding site in the mRNA mimics the binding site in the 23S rRNA                                                                                                                 |
| SACOL2138 |      | 2.87  | cation efflux family protein                         | identified by match to protein family HMM PF01545; match to protein family HMM TIGR01297                                                                                                                                                                           |
| SACOL1306 |      | 2.83  | hypothetical protein                                 | identified by similarity to GB:AAO04562.1                                                                                                                                                                                                                          |
| SACOL0625 |      | 2.61  | hypothetical protein                                 |                                                                                                                                                                                                                                                                    |
| SACOL1994 |      | 2.56  | ABC transporter ATP-binding protein                  | identified by match to protein family HMM PF00005                                                                                                                                                                                                                  |
| SACOL2246 |      | 2.55  | sugar transporter                                    | identified by match to protein family HMM PF06800                                                                                                                                                                                                                  |
| SACOL2524 |      | 2.55  | MarR family transcriptional regulator                | identified by match to protein family HMM PF01047                                                                                                                                                                                                                  |
| SACOL0678 |      | 2.53  | phage integrase integrase/recombinase                | identified by similarity to EGAD:9824; match to protein family HMM PF00589                                                                                                                                                                                         |
| SACOL0545 | rplY | 2.50  | 50S ribosomal protein L25/general stress protein Ctc | the Ctc family of proteins consists of two types, one that contains the N-terminal ribosomal protein L25 domain only which in Escherichia coli binds the 5S rRNA while a subset of proteins contain a C-terminal extension that is involved in the stress response |
| SACOL2088 |      | 2.46  | sceD protein                                         | identified by match to protein family HMM PF06737                                                                                                                                                                                                                  |
| SACOL2247 |      | 2.39  | hypothetical protein                                 |                                                                                                                                                                                                                                                                    |
| SACOL1257 | rplS | 2.37  | 50S ribosomal protein L19                            | this protein is located at the 30S-50S ribosomal subunit interface and may play a role in the structure and function of the aminoacyl-tRNA binding site                                                                                                            |

**Supplemental Table 2: Genes with significantly altered expression in response to ZnO-NPs**

|           |       |      |                                                    |                                                                                                                                                                                                                                                                                                                                                                                                                                                                                                                                                                                                                                                                         |
|-----------|-------|------|----------------------------------------------------|-------------------------------------------------------------------------------------------------------------------------------------------------------------------------------------------------------------------------------------------------------------------------------------------------------------------------------------------------------------------------------------------------------------------------------------------------------------------------------------------------------------------------------------------------------------------------------------------------------------------------------------------------------------------------|
| SACOL0583 | rplK  | 2.34 | 50S ribosomal protein L11                          | binds directly to 23S ribosomal RNA                                                                                                                                                                                                                                                                                                                                                                                                                                                                                                                                                                                                                                     |
| SACOL2731 |       | 2.33 | CSD family cold shock protein                      | identified by match to protein family HMM PF00313                                                                                                                                                                                                                                                                                                                                                                                                                                                                                                                                                                                                                       |
| SACOL2295 |       | 2.33 | staphyloxanthin biosynthesis protein               | identified by match to protein family HMM PF05257                                                                                                                                                                                                                                                                                                                                                                                                                                                                                                                                                                                                                       |
| SACOL0586 | rplL  | 2.19 | 50S ribosomal protein L7/L12                       | present in two forms; L12 is normal, while L7 is aminoacylated at the N-terminal serine; the only multicopy ribosomal protein; 4:1 ratio of L7/L12 per ribosome; two L12 dimers bind L10; critically important for translation efficiency and fidelity; stimulates GTPase activity of translation factors                                                                                                                                                                                                                                                                                                                                                               |
| SACOL2137 | czrA  | 2.18 | transcriptional regulator CzrA                     | identified by similarity to GP:4126673; similarity to OMNI:SA2137; match to protein family HMM PF01022                                                                                                                                                                                                                                                                                                                                                                                                                                                                                                                                                                  |
| SACOL2112 | rpmE2 | 2.16 | 50S ribosomal protein L31                          | RpmE2; there appears to be two types of ribosomal proteins L31 in bacterial genomes; some contain a CxxC motif while others do not; Bacillus subtilis has both types; the proteins in this cluster do not have the CXXC motif; RpmE is found in exponentially growing Bacilli while YtiA was found after exponential growth; expression of ytiA is controlled by a zinc-specific transcriptional repressor; RpmE contains one zinc ion and a CxxC motif is responsible for this binding; forms an RNP particle along with proteins L5, L18, and L25 and 5S rRNA; found crosslinked to L2 and L25 and EF-G; may be near the peptidyltransferase site of the 50S ribosome |
| SACOL2093 |       | 2.15 | hypothetical protein                               | identified by match to protein family HMM PF06612; match to protein family HMM TIGR02327                                                                                                                                                                                                                                                                                                                                                                                                                                                                                                                                                                                |
| SACOL1095 | cydB  | 2.13 | cytochrome d ubiquinol oxidase subunit II          | identified by similarity to GP:4514629                                                                                                                                                                                                                                                                                                                                                                                                                                                                                                                                                                                                                                  |
| SACOL1996 |       | 2.12 | ABC transporter ATP-binding protein                | identified by match to protein family HMM PF00005                                                                                                                                                                                                                                                                                                                                                                                                                                                                                                                                                                                                                       |
| SACOL2621 |       | 2.12 | hypothetical protein                               |                                                                                                                                                                                                                                                                                                                                                                                                                                                                                                                                                                                                                                                                         |
| SACOL0799 |       | 2.12 | transferrin receptor                               | identified by similarity to EGAD:22102; match to protein family HMM PF01497                                                                                                                                                                                                                                                                                                                                                                                                                                                                                                                                                                                             |
| SACOL1995 |       | 2.10 | hypothetical protein                               | identified by similarity to GB:AAO05222.1                                                                                                                                                                                                                                                                                                                                                                                                                                                                                                                                                                                                                               |
| SACOL2291 |       | 2.08 | staphyloxanthin biosynthesis protein               | identified by match to protein family HMM PF05257                                                                                                                                                                                                                                                                                                                                                                                                                                                                                                                                                                                                                       |
| SACOL0144 | cap5I | 2.03 | capsular polysaccharide biosynthesis protein Cap5I |                                                                                                                                                                                                                                                                                                                                                                                                                                                                                                                                                                                                                                                                         |
| SACOL1997 |       | 2.02 | GntR family transcriptional regulator              | identified by match to protein family HMM PF00392                                                                                                                                                                                                                                                                                                                                                                                                                                                                                                                                                                                                                       |
| SACOL1254 | rpsP  | 2.02 | 30S ribosomal protein S16                          | binds to lower part of 30S body where it stabilizes two domains; required for efficient assembly of 30S; in Escherichia coli this protein has nuclease activity                                                                                                                                                                                                                                                                                                                                                                                                                                                                                                         |
| SACOL0537 |       | 2.01 | hypothetical protein                               | identified by similarity to EGAD:13222; match to protein family HMM PF06257                                                                                                                                                                                                                                                                                                                                                                                                                                                                                                                                                                                             |
| SACOL1247 | acpP  | 2.01 | acyl carrier protein                               | carries the fatty acid chain in fatty acid biosynthesis                                                                                                                                                                                                                                                                                                                                                                                                                                                                                                                                                                                                                 |
| SACOL0142 | cap5G | 2.00 | UDP-N-acetylglucosamine 2-epimerase Cap5G          | identified by match to protein family HMM PF02350; match to protein family HMM TIGR00236                                                                                                                                                                                                                                                                                                                                                                                                                                                                                                                                                                                |
| SACOL1094 | cydA  | 2.00 | cytochrome d ubiquinol oxidase subunit I           | identified by match to protein family HMM PF01654                                                                                                                                                                                                                                                                                                                                                                                                                                                                                                                                                                                                                       |
| SACOL2290 |       | 1.97 | AraC family transcriptional regulator              | identified by match to protein family HMM PF00165                                                                                                                                                                                                                                                                                                                                                                                                                                                                                                                                                                                                                       |
| SACOL2511 | fnbA  | 1.95 | fibronectin-binding protein A                      | identified by similarity to SP:P14738; match to protein family HMM PF00746; match to protein family HMM PF02986; match to protein family HMM PF04650; match to protein family HMM TIGR01167; match to protein family HMM TIGR01168                                                                                                                                                                                                                                                                                                                                                                                                                                      |
| SACOL1035 |       | 1.95 | hypothetical protein                               | identified by similarity to EGAD:107617                                                                                                                                                                                                                                                                                                                                                                                                                                                                                                                                                                                                                                 |
| SACOL1993 |       | 1.93 | hypothetical protein                               | identified by similarity to GB:AAO05220.1                                                                                                                                                                                                                                                                                                                                                                                                                                                                                                                                                                                                                               |
| SACOL0585 | rplJ  | 1.91 | 50S ribosomal protein L10                          | binds the two ribosomal protein L7/L12 dimers and anchors them to the large ribosomal subunit                                                                                                                                                                                                                                                                                                                                                                                                                                                                                                                                                                           |
| SACOL2581 |       | 1.89 | staphyloxanthin biosynthesis protein               | identified by match to protein family HMM PF05257                                                                                                                                                                                                                                                                                                                                                                                                                                                                                                                                                                                                                       |
| SACOL1769 | rpsD  | 1.89 | 30S ribosomal protein S4                           | primary rRNA binding protein; nucleates 30S assembly; involved in translational accuracy with proteins S5 and S12; interacts with protein S5; involved in autogeneously regulating ribosomal proteins by binding to pseudoknot structures in the polycistronic mRNA; interacts with transcription complex and functions similar to protein NusA in antitermination                                                                                                                                                                                                                                                                                                      |
| SACOL2740 | rpmH  | 1.89 | 50S ribosomal protein L34                          | in Escherichia coli transcription of this gene is enhanced by polyamines                                                                                                                                                                                                                                                                                                                                                                                                                                                                                                                                                                                                |
| SACOL1036 |       | 1.88 | protease                                           | identified by match to protein family HMM PF02517                                                                                                                                                                                                                                                                                                                                                                                                                                                                                                                                                                                                                       |
| SACOL1292 | rpsO  | 1.88 | 30S ribosomal protein S15                          | primary rRNA binding protein; helps nucleate assembly of 30S; binds directly to the 16S rRNA and an intersubunit bridge to the 23S rRNA; autoregulates translation through interactions with the mRNA leader sequence                                                                                                                                                                                                                                                                                                                                                                                                                                                   |
| SACOL2532 |       | 1.87 | acetyltransferase                                  |                                                                                                                                                                                                                                                                                                                                                                                                                                                                                                                                                                                                                                                                         |
| SACOL1274 | rpsB  | 1.87 | 30S ribosomal protein S2                           | truncated; one of the last subunits in the assembly of the 30S subunit; absence of S2 does not inhibit assembly but results in an inactive subunit                                                                                                                                                                                                                                                                                                                                                                                                                                                                                                                      |
| SACOL1960 | gatB  | 1.86 | aspartyl/glutamyl-tRNA amidotransferase subunit B  | allows the formation of correctly charged Asn-tRNA(Asn) or Gln-tRNA(Gln) through the transamidation of misacylated Asp-tRNA(Asn) or Glu-tRNA(Gln) in organisms which lack either or both of asparaginyl-tRNA or glutaminyl-tRNA synthetases; reaction takes place in the presence of glutamine and ATP through an activated phospho-Asp-tRNA(Asn) or phospho-Glu-tRNA                                                                                                                                                                                                                                                                                                   |



**Supplemental Table 2: Genes with significantly altered expression in response to ZnO-NPs**

|           |       |      |                                                               |                                                                                                                                                                                                                                                                                                                                                                                                                                                                                          |
|-----------|-------|------|---------------------------------------------------------------|------------------------------------------------------------------------------------------------------------------------------------------------------------------------------------------------------------------------------------------------------------------------------------------------------------------------------------------------------------------------------------------------------------------------------------------------------------------------------------------|
| SACOL2226 | rpsN  | 1.85 | 30S ribosomal protein S14                                     | located in the peptidyl transferase center and involved in assembly of 30S ribosome subunit; similar to what is observed with proteins L31 and L33, some proteins in this family contain CXXC motifs that are involved in zinc binding; if two copies are present in a genome, then the duplicated copy appears to have lost the zinc-binding motif and is instead regulated by zinc; the proteins in this group appear to contain the zinc-binding motif                                |
| SACOL2481 |       | 1.85 | hypothetical protein                                          |                                                                                                                                                                                                                                                                                                                                                                                                                                                                                          |
| SACOL1053 |       | 1.84 | alpha/beta fold family hydrolase                              | identified by match to protein family HMM PF00561                                                                                                                                                                                                                                                                                                                                                                                                                                        |
| SACOL2227 | rplE  | 1.83 | 50S ribosomal protein L5                                      | part of 50S and 5S/L5/L18/L25 subcomplex; contacts 5S rRNA and P site tRNA; forms a bridge to the 30S subunit in the ribosome by binding to S13                                                                                                                                                                                                                                                                                                                                          |
| SACOL1650 | nadD  | 1.83 | nicotinate (nicotinamide) nucleotide adenyltransferase        | identified by similarity to OMNI:NTL01SPL0234; match to protein family HMM PF01467; match to protein family HMM TIGR00125; match to protein family HMM TIGR00482                                                                                                                                                                                                                                                                                                                         |
| SACOL1649 |       | 1.83 | hypothetical protein                                          | identified by similarity to OMNI:NTL01BH1330; match to protein family HMM PF01966; match to protein family HMM TIGR00488                                                                                                                                                                                                                                                                                                                                                                 |
| SACOL0146 | cap5K | 1.82 | capsular polysaccharide biosynthesis protein Cap5K            |                                                                                                                                                                                                                                                                                                                                                                                                                                                                                          |
| SACOL2251 |       | 1.82 | hypothetical protein                                          | identified by similarity to GB:AAO05474.1                                                                                                                                                                                                                                                                                                                                                                                                                                                |
| SACOL0437 | rpsF  | 1.82 | 30S ribosomal protein S6                                      | binds cooperatively with S18 to the S15-16S complex, allowing platform assembly to continue with S11 and S21                                                                                                                                                                                                                                                                                                                                                                             |
| SACOL2250 |       | 1.79 | hypothetical protein                                          |                                                                                                                                                                                                                                                                                                                                                                                                                                                                                          |
| SACOL2229 | rplN  | 1.79 | 50S ribosomal protein L14                                     | binds to the 23S rRNA between the centers for peptidyl transferase and GTPase                                                                                                                                                                                                                                                                                                                                                                                                            |
| SACOL2711 |       | 1.79 | hypothetical protein                                          | identified by match to protein family HMM PF04264                                                                                                                                                                                                                                                                                                                                                                                                                                        |
| SACOL1256 | trmD  | 1.79 | tRNA (guanine-N(1)-)-methyltransferase                        | methylates guanosine-37 in various tRNAs; uses S-adenosyl-L-methionine to transfer methyl group to tRNA                                                                                                                                                                                                                                                                                                                                                                                  |
| SACOL0680 |       | 1.79 | monovalent cation/H+ antiporter subunit B                     | subunit B of antiporter complex involved in resistance to high concentrations of Na+, K+, Li+ and/or alkali                                                                                                                                                                                                                                                                                                                                                                              |
| SACOL1481 |       | 1.78 | hypothetical protein                                          | identified by similarity to OMNI:NTL01BH1857; match to protein family HMM PF03413; match to protein family HMM PF03929                                                                                                                                                                                                                                                                                                                                                                   |
| SACOL0356 |       | 1.77 | hypothetical protein                                          | identified by similarity to GP:8918447; match to protein family HMM PF06260                                                                                                                                                                                                                                                                                                                                                                                                              |
| SACOL2509 | fnbB  | 1.77 | fibronectin binding protein B                                 | identified by match to protein family HMM PF00746; match to protein family HMM PF02986; match to protein family HMM PF04650; match to protein family HMM TIGR01167; match to protein family HMM TIGR01168                                                                                                                                                                                                                                                                                |
| SACOL1642 | rpsT  | 1.77 | 30S ribosomal protein S20                                     | binds directly to the 16S rRNA and is involved in post-translational inhibition of arginine and ornithine decarboxylase                                                                                                                                                                                                                                                                                                                                                                  |
| SACOL2289 | sarY  | 1.76 | hypothetical protein                                          | identified by match to protein family HMM TIGR01889                                                                                                                                                                                                                                                                                                                                                                                                                                      |
| SACOL1666 | udk   | 1.74 | uridine kinase                                                | functions in pyrimidine salvage; pyrimidine ribonucleoside kinase; phosphorylates nucleosides or dinucleosides to make UMP or CMP using ATP or GTP as the donor                                                                                                                                                                                                                                                                                                                          |
| SACOL2213 | rpoA  | 1.73 | DNA-directed RNA polymerase subunit alpha                     | catalyzes the transcription of DNA into RNA using the four ribonucleoside triphosphates as substrates. Dimerization of the alpha subunit is the first step in the sequential assembly of subunits to form the holoenzyme                                                                                                                                                                                                                                                                 |
| SACOL2230 | rpsQ  | 1.73 | 30S ribosomal protein S17                                     | primary binding protein; helps mediate assembly; involved in translation fidelity                                                                                                                                                                                                                                                                                                                                                                                                        |
| SACOL0939 |       | 1.72 | NifU domain-containing protein                                | identified by match to protein family HMM PF01106                                                                                                                                                                                                                                                                                                                                                                                                                                        |
| SACOL0684 |       | 1.72 | monovalent cation/H+ antiporter subunit E                     | subunit E of antiporter complex involved in resistance to high concentrations of Na+, K+, Li+ and/or alkali; in <i>S. meliloti</i> it is known to be involved specifically with K+ transport                                                                                                                                                                                                                                                                                             |
| SACOL2225 | rpsH  | 1.72 | 30S ribosomal protein S8                                      | binds directly to 16S rRNA central domain where it helps coordinate assembly of the platform of the 30S subunit                                                                                                                                                                                                                                                                                                                                                                          |
| SACOL1384 | opuD1 | 1.72 | BCCT family osmoprotectant transporter                        | identified by similarity to EGAD:45763; match to protein family HMM PF02028; match to protein family HMM TIGR00842                                                                                                                                                                                                                                                                                                                                                                       |
| SACOL0141 | cap5F | 1.71 | capsular polysaccharide biosynthesis protein Cap5F            |                                                                                                                                                                                                                                                                                                                                                                                                                                                                                          |
| SACOL2520 |       | 1.71 | hypothetical protein                                          | identified by match to protein family HMM PF05976                                                                                                                                                                                                                                                                                                                                                                                                                                        |
| SACOL2212 | rplQ  | 1.71 | 50S ribosomal protein L17                                     | is a component of the macrolide binding site in the peptidyl transferase center                                                                                                                                                                                                                                                                                                                                                                                                          |
| SACOL1443 | brnQ3 | 1.71 | branched-chain amino acid transport system II carrier protein | identified by match to protein family HMM PF05525; match to protein family HMM TIGR00796                                                                                                                                                                                                                                                                                                                                                                                                 |
| SACOL0143 | cap5H | 1.70 | capsular polysaccharide biosynthesis protein Cap5H            | identified by match to protein family HMM PF00132                                                                                                                                                                                                                                                                                                                                                                                                                                        |
| SACOL0685 |       | 1.70 | monovalent cation/H+ antiporter subunit F                     | subunit F of antiporter complex involved in resistance to high concentrations of Na+, K+, Li+ and/or alkali                                                                                                                                                                                                                                                                                                                                                                              |
| SACOL2183 | lacD  | 1.69 | tagatose 1,6-diphosphate aldolase                             | catalyzes the reversible reaction of dihydroxyacetone phosphate with glyceraldehyde 3-phosphate to produce tagatose 1,6-bisphosphate; in <i>Streptococcus pyogenes</i> there are two paralogs of tagatose-bisphosphate aldolase, encoded by lacD1 and lacD2; expression of lacD1 is highly regulated by environmental conditions while lacD2 specializes in an efficient utilization of carbohydrate sources                                                                             |
| SACOL2224 | rplF  | 1.69 | 50S ribosomal protein L6                                      | ribosomal protein L6 appears to have arisen as a result of an ancient gene duplication as based on structural comparison of the <i>Bacillus stearothermophilus</i> protein; RNA-binding appears to be in the C-terminal domain; mutations in the L6 gene confer resistance to aminoglycoside antibiotics such as gentamicin and these occur in truncations of the C-terminal domain; it has been localized to a region between the base of the L7/L12 stalk and the central protuberance |
| SACOL1761 |       | 1.69 | hypothetical protein                                          | identified by similarity to EGAD:11836                                                                                                                                                                                                                                                                                                                                                                                                                                                   |

**Supplemental Table 2: Genes with significantly altered expression in response to ZnO-NPs**

|           |       |      |                                                                  |                                                                                                                                                                                                                                                              |
|-----------|-------|------|------------------------------------------------------------------|--------------------------------------------------------------------------------------------------------------------------------------------------------------------------------------------------------------------------------------------------------------|
| SACOL2214 | rpsK  | 1.69 | 30S ribosomal protein S11                                        | located on the platform of the 30S subunit, it bridges several disparate RNA helices of the 16S rRNA; forms part of the Shine-Dalgarno cleft in the 70S ribosome; interacts with S7 and S18 and IF-3                                                         |
| SACOL1685 | aspS  | 1.68 | aspartyl-tRNA synthetase                                         | catalyzes a two-step reaction, first charging an aspartate molecule by linking its carboxyl group to the alpha-phosphate of ATP, followed by transfer of the aminoacyl-adenylate to its tRNA; contains discriminating and non-discriminating subtypes        |
| SACOL2215 | rpsM  | 1.67 | 30S ribosomal protein S13                                        | located at the top of the head of the 30S subunit, it contacts several helices of the 16S rRNA; makes contact with the large subunit via RNA-protein interactions and via protein-protein interactions with L5; contacts P-site tRNA                         |
| SACOL0630 |       | 1.67 | amino acid permease                                              | identified by match to protein family HMM PF00324                                                                                                                                                                                                            |
| SACOL1482 |       | 1.67 | hypothetical protein                                             |                                                                                                                                                                                                                                                              |
| SACOL1286 |       | 1.67 | hypothetical protein                                             | identified by similarity to OMNI:NTL01BH2418; match to protein family HMM PF04296                                                                                                                                                                            |
| SACOL1298 |       | 1.66 | M16 family peptidase                                             | identified by match to protein family HMM PF00675; match to protein family HMM PF05193                                                                                                                                                                       |
| SACOL1378 |       | 1.66 | hypothetical protein                                             | identified by similarity to SP:Q8CSP3; match to protein family HMM PF03672                                                                                                                                                                                   |
| SACOL2580 |       | 1.66 | hypothetical protein                                             |                                                                                                                                                                                                                                                              |
| SACOL2222 | rpsE  | 1.66 | 30S ribosomal protein S5                                         | located at the back of the 30S subunit body where it stabilizes the conformation of the head with respect to the body; contacts S4 and S8; with S4 and S12 plays a role in translational accuracy; mutations in this gene result in spectinomycin resistance |
| SACOL1287 |       | 1.66 | 50S ribosomal protein L7                                         | identified by similarity to EGAD:9717; match to protein family HMM PF01248                                                                                                                                                                                   |
| SACOL0438 | ssb2  | 1.66 | single-stranded DNA-binding protein                              | identified by similarity to EGAD:17778; match to protein family HMM PF00436; match to protein family HMM TIGR00621                                                                                                                                           |
| SACOL2737 | gidA  | 1.65 | tRNA uridine 5-carboxymethylaminomethyl modification enzyme GidA | GidA; glucose-inhibited cell division protein A; involved in the 5-carboxymethylaminomethyl modification (mnm(5)s(2)U) of the wobble uridine base in some tRNAs                                                                                              |
| SACOL0360 |       | 1.65 | hypothetical protein                                             |                                                                                                                                                                                                                                                              |
| SACOL0679 |       | 1.65 | monovalent cation/H <sup>+</sup> antiporter subunit A            | subunit A of antiporter complex involved in resistance to high concentrations of Na <sup>+</sup> , K <sup>+</sup> , Li <sup>+</sup> and/or alkali                                                                                                            |
| SACOL0686 |       | 1.65 | monovalent cation/H <sup>+</sup> antiporter subunit G            | subunit G of antiporter complex involved in resistance to high concentrations of Na <sup>+</sup> , K <sup>+</sup> , Li <sup>+</sup> and/or alkali                                                                                                            |
| SACOL2231 | rpmC  | 1.65 | 50S ribosomal protein L29                                        | one of the stabilizing components for the large ribosomal subunit                                                                                                                                                                                            |
| SACOL2221 | rpmD  | 1.64 | 50S ribosomal protein L30                                        | L30 binds domain II of the 23S rRNA and the 5S rRNA; similar to eukaryotic protein L7                                                                                                                                                                        |
| SACOL1118 | typA  | 1.64 | GTP-binding protein TypA                                         | identified by match to protein family HMM PF00009; match to protein family HMM PF00679; match to protein family HMM PF03144; match to protein family HMM TIGR00231; match to protein family HMM TIGR01394                                                    |
| SACOL2220 | rplO  | 1.64 | 50S ribosomal protein L15                                        | late assembly protein                                                                                                                                                                                                                                        |
| SACOL2082 |       | 1.64 | hypothetical protein                                             | identified by match to protein family HMM PF02096                                                                                                                                                                                                            |
| SACOL0946 |       | 1.64 | Na <sup>+</sup> /H <sup>+</sup> antiporter family protein        | identified by similarity to GP:10175982; match to protein family HMM PF03553                                                                                                                                                                                 |
| SACOL1299 |       | 1.64 | acetoacetyl-CoA reductase                                        | identified by similarity to GP:10175011; match to protein family HMM PF00106                                                                                                                                                                                 |
| SACOL0468 |       | 1.63 | superantigen-like protein                                        | these proteins share structural homology to known superantigen proteins but do not exhibit any of the properties expected such as histocompatibility complex class II binding or broad T-cell activation                                                     |
| SACOL1651 |       | 1.63 | hypothetical protein                                             | identified by similarity to EGAD:45796; match to protein family HMM PF01985; match to protein family HMM TIGR00253                                                                                                                                           |
| SACOL2134 |       | 1.63 | hypothetical protein                                             | identified by similarity to GB:AAO5341.1                                                                                                                                                                                                                     |
| SACOL2107 |       | 1.62 | phosphotyrosine protein phosphatase                              | identified by similarity to EGAD:30369; match to protein family HMM PF01451                                                                                                                                                                                  |
| SACOL0590 |       | 1.62 | ribosomal protein L7Ae-like                                      | in <i>Bacillus subtilis</i> this non-essential protein associates with the ribosome                                                                                                                                                                          |
| SACOL1238 | rpmB  | 1.61 | 50S ribosomal protein L28                                        | required for 70S ribosome assembly                                                                                                                                                                                                                           |
| SACOL1288 | infB  | 1.61 | translation initiation factor IF-2                               | Protects formylmethionyl-tRNA from spontaneous hydrolysis and promotes its binding to the 30S ribosomal subunits during initiation of protein synthesis. Also involved in the hydrolysis of GTP during the formation of the 70S ribosomal complex            |
| SACOL2306 |       | 1.61 | hypothetical protein                                             | identified by similarity to GP:10173173; match to protein family HMM PF02517                                                                                                                                                                                 |
| SACOL2482 | fabG2 | 1.61 | 3-oxoacyl-(acyl carrier protein) reductase                       | 3-oxoacyl-(acyl carrier protein) reductase, authentic point mutation; this gene contains a premature stop which is not the result of sequencing error; identified by similarity to EGAD:108288                                                               |
| SACOL1255 | rimM  | 1.61 | 16S rRNA-processing protein RimM                                 | Essential for efficient processing of 16S rRNA                                                                                                                                                                                                               |
| SACOL2232 | rplP  | 1.60 | 50S ribosomal protein L16                                        | located in the peptidyl transferase center and may be involved in peptidyl transferase activity; similar to archaeal L10e                                                                                                                                    |
| SACOL1567 | xseB  | 1.60 | exodeoxyribonuclease VII small subunit                           | catalyzes the bidirectional exonucleolytic cleavage of DNA                                                                                                                                                                                                   |
| SACOL0763 |       | 1.60 | aldo/keto reductase oxidoreductase                               | identified by match to protein family HMM PF00248                                                                                                                                                                                                            |
| SACOL2136 |       | 1.60 | hypothetical protein                                             |                                                                                                                                                                                                                                                              |
| SACOL1317 | glpP  | 1.60 | glycerol uptake operon antiterminator regulatory protein         | identified by similarity to EGAD:18158; match to protein family HMM PF04309                                                                                                                                                                                  |
| SACOL1587 | efp   | 1.60 | elongation factor P                                              | Involved in peptide bond synthesis; alters the affinity of the ribosome for aminoacyl-tRNA                                                                                                                                                                   |

**Supplemental Table 2: Genes with significantly altered expression in response to ZnO-NPs**

|           |       |      |                                                                 |                                                                                                                                                                                                                                                                                                                                                                                                                |
|-----------|-------|------|-----------------------------------------------------------------|----------------------------------------------------------------------------------------------------------------------------------------------------------------------------------------------------------------------------------------------------------------------------------------------------------------------------------------------------------------------------------------------------------------|
| SACOL2052 |       | 1.59 | hypothetical protein                                            | identified by match to protein family HMM PF03926                                                                                                                                                                                                                                                                                                                                                              |
| SACOL0357 | dut   | 1.58 | prophage L54a, deoxyuridine 5'-triphosphate nucleotidohydrolase | identified by similarity to SP:P33316; match to protein family HMM PF00692                                                                                                                                                                                                                                                                                                                                     |
| SACOL1647 |       | 1.58 | hypothetical protein                                            | identified by similarity to OMNI:NTL01BH1333                                                                                                                                                                                                                                                                                                                                                                   |
| SACOL2223 | rplR  | 1.58 | 50S ribosomal protein L18                                       | binds 5S rRNA along with protein L5 and L25                                                                                                                                                                                                                                                                                                                                                                    |
| SACOL2233 | rpsC  | 1.58 | 30S ribosomal protein S3                                        | forms a complex with S10 and S14; binds the lower part of the 30S subunit head and the mRNA in the complete ribosome to position it for translation                                                                                                                                                                                                                                                            |
| SACOL2182 | lacF  | 1.58 | PTS system, lactose-specific IIA component                      | identified by similarity to EGAD:18801; match to protein family HMM PF02255; match to protein family HMM TIGR00823                                                                                                                                                                                                                                                                                             |
| SACOL1208 | lspA  | 1.57 | lipoprotein signal peptidase                                    | lipoprotein signal peptidase; integral membrane protein that removes signal peptides from prolipoproteins during lipoprotein biosynthesis                                                                                                                                                                                                                                                                      |
| SACOL1788 |       | 1.57 | hypothetical protein                                            |                                                                                                                                                                                                                                                                                                                                                                                                                |
| SACOL0859 |       | 1.57 | hypothetical protein                                            |                                                                                                                                                                                                                                                                                                                                                                                                                |
| SACOL1653 |       | 1.57 | GTP-binding protein YqeH                                        | in <i>Bacillus subtilis</i> this enzyme appears to be involved in 30S ribosomal RNA subunit biogenesis                                                                                                                                                                                                                                                                                                         |
| SACOL1652 | aroE  | 1.57 | shikimate 5-dehydrogenase                                       | identified by similarity to EGAD:45757; match to protein family HMM PF01488; match to protein family HMM TIGR00507                                                                                                                                                                                                                                                                                             |
| SACOL1665 | greA  | 1.57 | transcription elongation factor GreA                            | necessary for efficient RNA polymerase transcription elongation past template-encoded arresting sites; arresting sites in DNA have the property of trapping a certain fraction of elongating RNA polymerases that pass through, resulting in locked ternary complexes. Cleavage of the nascent transcript by cleavage factors such as GreA or GreB allows the resumption of elongation from the new 3'terminus |
| SACOL1722 | tig   | 1.56 | trigger factor                                                  | Tig; RopA; peptidyl-prolyl cis/trans isomerase; promotes folding of newly synthesized proteins; binds ribosomal 50S subunit; forms a homodimer                                                                                                                                                                                                                                                                 |
| SACOL1635 | prmA  | 1.56 | 50S ribosomal protein L11 methyltransferase                     | methylates ribosomal protein L11 at multiple amino acid positions; mutations of these genes in <i>Escherichia coli</i> or <i>Thermus thermophilus</i> has no apparent phenotype                                                                                                                                                                                                                                |
| SACOL0746 | norR  | 1.56 | MarR family transcriptional regulator                           | identified by match to protein family HMM PF01047                                                                                                                                                                                                                                                                                                                                                              |
| SACOL2228 | rplX  | 1.55 | 50S ribosomal protein L24                                       | assembly initiator protein; binds to 5' end of 23S rRNA and nucleates assembly of the 50S; surrounds polypeptide exit tunnel                                                                                                                                                                                                                                                                                   |
| SACOL1693 | yajC  | 1.55 | preprotein translocase, YajC subunit                            | identified by match to protein family HMM PF02699; match to protein family HMM TIGR00739                                                                                                                                                                                                                                                                                                                       |
| SACOL0589 | rpoC  | 1.55 | DNA-directed RNA polymerase subunit beta'                       | DNA-dependent RNA polymerase catalyzes the transcription of DNA into RNA using the four ribonucleoside triphosphates as substrates. Subunit beta' binds to sigma factor allowing it to bind to the -10 region of the promoter                                                                                                                                                                                  |
| SACOL0987 | fabH  | 1.54 | 3-oxoacyl-ACP synthase                                          | FabH; beta-ketoacyl-acyl carrier protein synthase III; catalyzes the condensation of acetyl-CoA with malonyl-ACP to initiate cycles of fatty acid elongation; differs from 3-oxoacyl-(acyl carrier protein) synthase I and II in that it utilizes CoA thioesters as primers rather than acyl-ACPs                                                                                                              |
| SACOL0145 | cap5J | 1.54 | capsular polysaccharide biosynthesis protein Cap5J              | identified by match to protein family HMM PF04932                                                                                                                                                                                                                                                                                                                                                              |
| SACOL1965 | ligA  | 1.54 | DNA ligase, NAD-dependent                                       | identified by similarity to SP:O87703; match to protein family HMM PF00533; match to protein family HMM PF01653; match to protein family HMM PF03119; match to protein family HMM PF03120; match to protein family HMM TIGR00575                                                                                                                                                                               |
| SACOL2736 | gidB  | 1.54 | 16S rRNA methyltransferase GidB                                 | glucose-inhibited division protein B; SAM-dependent methyltransferase; methylates the N7 position of guanosine in position 527 of 16S rRNA                                                                                                                                                                                                                                                                     |
| SACOL2216 | rpmJ  | 1.54 | 50S ribosomal protein L36                                       | smallest protein in the large subunit; similar to what is found with protein L31 and L33 several bacterial genomes contain paralogs which may be regulated by zinc; the protein from <i>Thermus thermophilus</i> has a zinc-binding motif and contains a bound zinc ion; the proteins in this group have the motif                                                                                             |
| SACOL1489 | recU  | 1.54 | Holliday junction-specific endonuclease                         | functions in homologous recombination, DNA repair, and chromosome segregation; binds preferentially to three- and four-stranded DNA intermediates; introduces specific nick sites in four-stranded DNA substrates; functions similarly to <i>Escherichia coli</i> RuvC                                                                                                                                         |
| SACOL2680 |       | 1.54 | hypothetical protein                                            |                                                                                                                                                                                                                                                                                                                                                                                                                |
| SACOL1290 | truB  | 1.53 | tRNA pseudouridine synthase B                                   | catalyzes isomerization of specific uridines in RNA to pseudouridine; responsible for residues in T loops of many tRNAs                                                                                                                                                                                                                                                                                        |
| SACOL1067 | qoxD  | 1.53 | quinol oxidase subunit IV                                       | identified by match to protein family HMM PF03626                                                                                                                                                                                                                                                                                                                                                              |
| SACOL1716 | hemD  | 1.53 | uroporphyrinogen III synthase                                   | identified by match to protein family HMM PF02602                                                                                                                                                                                                                                                                                                                                                              |
| SACOL1953 |       | 1.52 | hypothetical protein                                            |                                                                                                                                                                                                                                                                                                                                                                                                                |
| SACOL1646 | comEA | 1.52 | comE operon protein 1-like protein                              | identified by similarity to OMNI:NTL01SA1471; match to protein family HMM PF00633; match to protein family HMM TIGR00426                                                                                                                                                                                                                                                                                       |
| SACOL1632 | rpsU  | 1.52 | 30S ribosomal protein S21                                       | a small basic protein that is one of the last in the subunit assembly; omission does not prevent assembly but the subunit is inactive; binds central domain of 16S rRNA                                                                                                                                                                                                                                        |
| SACOL1282 | proS  | 1.52 | prolyl-tRNA synthetase                                          | catalyzes the formation of prolyl-tRNA(Pro) from proline and tRNA(Pro)                                                                                                                                                                                                                                                                                                                                         |
| SACOL1297 |       | 1.52 | hypothetical protein                                            | identified by similarity to OMNI:NTL01BH2396; match to protein family HMM PF05193                                                                                                                                                                                                                                                                                                                              |
| SACOL1316 | mutL  | 1.52 | DNA mismatch repair protein                                     | This protein is involved in the repair of mismatches in DNA. It is required for dam-dependent methyl-directed DNA mismatch repair. Promotes the formation of a stable complex between two or more DNA-binding proteins in an ATP-dependent manner without itself being part of a final effector complex                                                                                                        |
| SACOL1700 | rpmA  | 1.52 | 50S ribosomal protein L27                                       | involved in the peptidyltransferase reaction during translation                                                                                                                                                                                                                                                                                                                                                |

**Supplemental Table 2: Genes with significantly altered expression in response to ZnO-NPs**

|           |      |                                                         |                                                                                                                                                                                                                                                                                                                                                |
|-----------|------|---------------------------------------------------------|------------------------------------------------------------------------------------------------------------------------------------------------------------------------------------------------------------------------------------------------------------------------------------------------------------------------------------------------|
| SACOL1968 | 1.51 | hypothetical protein                                    | identified by match to protein family HMM PF01371                                                                                                                                                                                                                                                                                              |
| SACOL1242 | 1.51 | fatty acid biosynthesis transcriptional regulator       | negative regulator of genes involved in fatty acid and phospholipid biosynthesis for gram positive bacteria                                                                                                                                                                                                                                    |
| SACOL2375 | 1.51 | CorA family protein                                     | identified by match to protein family HMM PF01544                                                                                                                                                                                                                                                                                              |
| SACOL2720 | 1.51 | hypothetical protein                                    |                                                                                                                                                                                                                                                                                                                                                |
| SACOL1791 | 1.51 | FtsK/SpoIIIE family protein                             | identified by match to protein family HMM PF01580                                                                                                                                                                                                                                                                                              |
| SACOL1667 | 1.50 | U32 family peptidase                                    | identified by match to protein family HMM PF01136                                                                                                                                                                                                                                                                                              |
| SACOL0682 | 1.50 | monovalent cation/H <sup>+</sup> antiporter subunit D   | subunit D of antiporter complex involved in resistance to high concentrations of Na <sup>+</sup> , K <sup>+</sup> , Li <sup>+</sup> and/or alkali; contains an oxidoreductase domain; catalyzes the transfer of electrons from NADH to ubiquinone; in <i>S. meliloti</i> it is known to be involved specifically with K <sup>+</sup> transport |
| SACOL1154 | 1.50 | recombination and DNA strand exchange inhibitor protein | MutS2; MutS-II; involved in blocking homologous and homeologous recombination; has ATPase activity stimulated by recombination intermediates; inhibits DNA strand exchange                                                                                                                                                                     |

**Supplemental Table 3:** Pathways with genes significantly enriched (up or downregulated) by ZnO-NPs

| Pathways                                               | p-values   | Genes                                                                                                                                                                                                                                        | Sub-Pathways                                                                                                                                                                                   |
|--------------------------------------------------------|------------|----------------------------------------------------------------------------------------------------------------------------------------------------------------------------------------------------------------------------------------------|------------------------------------------------------------------------------------------------------------------------------------------------------------------------------------------------|
| <b>Downregulated</b>                                   |            |                                                                                                                                                                                                                                              |                                                                                                                                                                                                |
| Amino acids biosynthesis                               | 0.0169459  | aroK<br>ilvH<br>ilvE<br>rocF<br>rocD<br>proC<br>rocA<br>ilvB<br>budB<br>ilvC<br>ilvD<br>pth<br>lysC<br>asd<br>dapA<br>dapD<br>lysA<br>leuC<br>leuD<br>leuA<br>leuB<br>gltB<br>arcB1<br>ilvA1<br>ilvA2<br>hom<br>metX<br>thrC<br>thrB<br>acsA | This class contains the pathways of biosynthesis of each of the 21 amino acids present normally in proteins.                                                                                   |
| <b>Upregulated</b>                                     |            |                                                                                                                                                                                                                                              |                                                                                                                                                                                                |
| Superpathway of pyrimidine <i>de novo</i> biosynthesis | 0.002223   | pyrF<br>pyrE<br>pyrC<br>pyrB<br>carB<br>carA<br>dut                                                                                                                                                                                          | UTP and CTP <i>de novo</i> biosynthesis; UMP biosynthesis; Superpathway of pyrimidine ribonucleotides <i>de novo</i> biosynthesis; Pyrimidine deoxyribonucleotides <i>de novo</i> biosynthesis |
| Lactose and galactose degradation                      | 0.02163352 | lacD<br>lacB<br>lacA<br>lacC                                                                                                                                                                                                                 |                                                                                                                                                                                                |

**Supplemental Table 4:** Oxidation/reduction gene expression altered by ZnO-NPs

| <b>Gene</b>                                      | <b>ID</b> | <b>Fold change</b> |
|--------------------------------------------------|-----------|--------------------|
| <b><i>Down-regulated</i></b>                     |           |                    |
| Nitrate reductase gamma chain (narL)             | SACOL2392 | -2.56              |
| Thioredoxin                                      | SACOL2550 | -2.16              |
| NAD dehydrogenase                                | SACOL0941 | -2.11              |
| Acyl carrier protein phosphodiesterase (acpD)    | SACOL0190 | -1.80              |
| Succinate dehydrogenase (sdhA)                   | SACOL1159 | -1.74              |
| Catalase (katA)                                  | SACOL1368 | -1.72              |
| NADP flavin oxidoreductase (frpP)                | SACOL2534 | -1.69              |
| Luciferase                                       | SACOL0394 | -1.62              |
| Thioredoxin reductase                            | SACOL2369 | -1.59              |
| <b><i>Up-regulated</i></b>                       |           |                    |
| Oxidoreductase                                   | SACOL0763 | 1.60               |
| Cytochrome d ubiquinol oxidase subunit I (cydA)  | SACOL1094 | 2.00               |
| Cytochrome d ubiquinol oxidase subunit II (cydB) | SACOL1095 | 2.13               |
